# Supplementary material for: LUZP1, a novel regulator of primary cilia and the actin cytoskeleton, is a contributing factor in Townes-Brocks Syndrome
Source: eLife. 2020 Jun 18;9:e55957. doi: 10.7554/eLife.55957 (PMC7363444; doi:10.7554/eLife.55957)
Supplement: Source data 1. [file elife-55957-data1.xlsx]

## Sheet: LUZP1-TurboID >1 fold enriched
T: Entry		Gene Name	T: Description	T: #Peptides	T: #Unique	C: Student's T-test Significant Ctrl_LUZP1	C: Student's T-test significant	N: -Log Student's T-test p-value Ctrl_LUZP1	N: Student's T-test Difference Ctrl_LUZP1	p value	LUZP1/CTRL	N: Student's T-test Test statistic Ctrl_LUZP1	S4 Intensity	S5 Intensity	S6 Intensity	S1 Intensity	S2 Intensity	S3 Intensity	S_CNTR	S_LUZP1	ENRICHED LUZP1 LOG2
LUZP1	HUMAN	LUZP1	Leucine zipper protein 1 OS=Homo sapiens GN=LUZP1 PE=1 SV=2	76	76	+	Ctrl_LUZP1	5.0371	-4.53372	9.18121e-06	23.1625	-28.3737	14.4576	14.7628	14.3021	19.1655	19.0795	18.8787	14.5075	19.0412	4.53373
CALD1	HUMAN	CALD1	Caldesmon OS=Homo sapiens GN=CALD1 PE=1 SV=3	30	28	+	Ctrl_LUZP1	3.70162	-1.7102	0.000198783	3.27206	-13.0539	14.887	15.049	14.7366	16.417	16.6523	16.734	14.8909	16.6011	1.71023
CE170	HUMAN	CEP170	Centrosomal protein of 170 kDa OS=Homo sapiens GN=CEP170 PE=1 SV=1	25	23	+	Ctrl_LUZP1	3.65943	-2.16223	0.000219063	4.47606	-12.7345	12.2527	12.464	11.8956	14.4383	14.3373	14.3233	12.2041	14.3663	2.1622
LIMC1	HUMAN	LIMCH1	LIM and calponin homology domains-containing protein 1 OS=Homo sapiens GN=LIMCH1 PE=1 SV=4	30	30	+	Ctrl_LUZP1	3.61449	-2.11462	0.000242946	4.33076	-12.4026	12.8994	13.0918	12.5459	14.9106	15.0785	14.8918	12.8457	14.9603	2.1146
C102A	HUMAN	CCDC102A	Coiled-coil domain-containing protein 102A OS=Homo sapiens GN=CCDC102A PE=1 SV=2	6	6	+	Ctrl_LUZP1	3.44846	-1.62932	0.000356074	3.09367	-11.2464	10.4615	10.2167	10.0901	11.7313	11.865	12.06	10.2561	11.8854	1.62933
PALLD	HUMAN	PALLD	Palladin OS=Homo sapiens GN=PALLD PE=1 SV=3	10	10	+	Ctrl_LUZP1	3.43191	-1.97641	0.000369905	3.93513	-11.137	11.6211	11.6073	11.2348	13.2213	13.5387	13.6325	11.4877	13.4642	1.97643
LMO7	HUMAN	LMO7	LIM domain only protein 7 OS=Homo sapiens GN=LMO7 PE=1 SV=3	53	53	+	Ctrl_LUZP1	3.42998	-2.93191	0.000371552	7.6312	-11.1243	14.4383	14.8727	13.9658	17.4087	17.3056	17.3581	14.4256	17.3575	2.93187
FIL1L	HUMAN	FILIP1L	Filamin A-interacting protein 1-like OS=Homo sapiens GN=FILIP1L PE=1 SV=2	27	27	+	Ctrl_LUZP1	3.39586	-3.14669	0.00040192	8.85621	-10.902	12.0189	12.2167	11.3934	14.7313	15.2061	15.1317	11.8763	15.023	3.1467
DOCK7	HUMAN	DOCK7	Dedicator of cytokinesis protein 7 OS=Homo sapiens GN=DOCK7 PE=1 SV=4	7	7	+	Ctrl_LUZP1	3.32845	-1.40538	0.000469407	2.64888	-10.4753	10.0084	9.86728	9.66711	11.0768	11.3049	11.3772	9.8476	11.253	1.40537
CP131	HUMAN	CEP131	Centrosomal protein of 131 kDa OS=Homo sapiens GN=CEP131 PE=1 SV=3	16	15	+	Ctrl_LUZP1	3.30784	-3.00804	0.000492221	8.04471	-10.348	9.59246	9.62571	10.3987	12.6348	12.9908	13.0154	9.87229	12.8803	3.00804
PKHA5	HUMAN	PLEKHA5	Pleckstrin homology domain-containing family A member 5 OS=Homo sapiens GN=PLEKHA5 PE=1 SV=1	5	5	+	Ctrl_LUZP1	3.30115	-5.67237	0.000499862	50.998	-10.307	7.25809	8.02937	7	13.5981	13.5142	12.1923	7.42915	13.1015	5.67238
MYPT1	HUMAN	PPP1R12A	Protein phosphatase 1 regulatory subunit 12A OS=Homo sapiens GN=PPP1R12A PE=1 SV=1	16	16	+	Ctrl_LUZP1	3.02831	-2.1593	0.000936893	4.46698	-8.75802	10.8918	10.9293	10.7895	12.5435	13.2718	13.2732	10.8702	13.0295	2.1593
ACTN1	HUMAN	ACTN1	Alpha-actinin-1 OS=Homo sapiens GN=ACTN1 PE=1 SV=2	19	13	+	Ctrl_LUZP1	2.96938	-2.18541	0.00107305	4.54856	-8.4531	11.4564	11.4147	10.697	13.2674	13.5265	13.3304	11.1894	13.3748	2.1854
PALMD	HUMAN	PALMD	Palmdelphin OS=Homo sapiens GN=PALMD PE=1 SV=1	4	4	+	Ctrl_LUZP1	2.94496	-2.09562	0.00113512	4.2741	-8.32957	11.0701	10.8765	10.5018	12.5722	12.9403	13.2228	10.8161	12.9118	2.09563
MAP1A	HUMAN	MAP1A	Microtubule-associated protein 1A OS=Homo sapiens GN=MAP1A PE=1 SV=6	28	27	+	Ctrl_LUZP1	2.9265	-2.986	0.0011844	7.92274	-8.23729	11.7013	11.388	10.8765	14.6551	14.4956	13.7731	11.3219	14.3079	2.986
MPRIP	HUMAN	MPRIP	Myosin phosphatase Rho-interacting protein OS=Homo sapiens GN=MPRIP PE=1 SV=3	22	22	+	Ctrl_LUZP1	2.91752	-2.03022	0.00120915	4.08467	-8.19279	12.1768	12.4173	11.7649	14.1196	14.4383	13.8918	12.1197	14.1499	2.03023
NDC80	HUMAN	NDC80	Kinetochore protein NDC80 homolog OS=Homo sapiens GN=NDC80 PE=1 SV=1	3	3	+	Ctrl_LUZP1	2.87319	-2.49402	0.00133909	5.63346	-7.97602	7.77479	6.87439	7.40939	9.75154	9.60918	10.1799	7.35286	9.84687	2.49402
LPP	HUMAN	LPP	Lipoma-preferred partner OS=Homo sapiens GN=LPP PE=1 SV=1	5	5	+	Ctrl_LUZP1	2.8535	-1.19897	0.0014012	2.29576	-7.88143	11.4919	11.3718	11.1033	12.3415	12.5362	12.6861	11.3223	12.5213	1.19893
ZYX	HUMAN	ZYX	Zyxin OS=Homo sapiens GN=ZYX PE=1 SV=1	10	10	+	Ctrl_LUZP1	2.83572	-1.41651	0.00145976	2.66939	-7.79688	12.3415	12.605	12.1954	14.0701	13.6662	13.6551	12.3806	13.7971	1.4165
ACACA	HUMAN	ACACA	Acetyl-CoA carboxylase 1 OS=Homo sapiens GN=ACACA PE=1 SV=2	26	26	+	Ctrl_LUZP1	2.79765	-1.20552	0.00159349	2.3062	-7.61858	12.2467	11.8297	11.8956	13.1501	13.0668	13.3718	11.9907	13.1962	1.20557
DPYL3	HUMAN	DPYSL3	Dihydropyrimidinase-related protein 3 OS=Homo sapiens GN=DPYSL3 PE=1 SV=1	9	5	+	Ctrl_LUZP1	2.71427	-0.794188	0.00193077	1.7341	-7.2407	11.3443	11.2228	11.0768	12.1643	11.9256	11.9366	11.2146	12.0088	0.7942
SMTN	HUMAN	SMTN	Smoothelin OS=Homo sapiens GN=SMTN PE=1 SV=7	10	10	+	Ctrl_LUZP1	2.69321	-1.76782	0.0020267	3.40539	-7.14791	9.94837	10.1293	10.0634	11.3443	12.1453	11.9549	10.047	11.8148	1.76781
ZN185	HUMAN	ZNF185	Zinc finger protein 185 OS=Homo sapiens GN=ZNF185 PE=1 SV=3	13	13	+	Ctrl_LUZP1	2.63436	-1.49117	0.00232081	2.81117	-6.89414	12.0396	11.6883	11.7607	13.0049	13.3021	13.6551	11.8295	13.3207	1.49117
MAP1B	HUMAN	MAP1B	Microtubule-associated protein 1B OS=Homo sapiens GN=MAP1B PE=1 SV=2	58	56	+	Ctrl_LUZP1	2.4573	-1.81193	0.00348899	3.51112	-6.17713	15.9658	15.5049	15.1556	17.6382	17.392	17.0319	15.5421	17.354	1.81193
SIR2	HUMAN	SIRT2	NAD-dependent protein deacetylase sirtuin-2 OS=Homo sapiens GN=SIRT2 PE=1 SV=2	2	2	+	Ctrl_LUZP1	2.4383	-3.2145	0.00364502	9.28241	-6.10409	6.50183	6.38351	6.22115	9.58871	8.67948	10.4818	6.36883	9.58333	3.2145
LIMA1	HUMAN	LIMA1	LIM domain and actin-binding protein 1 OS=Homo sapiens GN=LIMA1 PE=1 SV=1	12	12	+	Ctrl_LUZP1	2.37464	-2.38305	0.00422046	5.21638	-5.86468	12.9944	11.7013	12.3443	14.4252	14.7936	14.9703	12.3467	14.7297	2.38303
LMOD1	HUMAN	LMOD1	Leiomodin-1 OS=Homo sapiens GN=LMOD1 PE=1 SV=3	4	4	+	Ctrl_LUZP1	2.34606	-0.773213	0.00450754	1.70907	-5.75975	9.38154	9.48784	9.35315	10.0084	10.4305	10.1033	9.40751	10.1807	0.773223
FLNC	HUMAN	FLNC	Filamin-C OS=Homo sapiens GN=FLNC PE=1 SV=3	38	31	+	Ctrl_LUZP1	2.34477	-1.11644	0.00452095	2.16811	-5.75506	13.6439	13.3443	13.0768	14.6382	14.4956	14.2805	13.355	14.4714	1.11643
SRC8	HUMAN	CTTN	Src substrate cortactin OS=Homo sapiens GN=CTTN PE=1 SV=2	29	29	+	Ctrl_LUZP1	2.30981	-0.970903	0.00489993	1.96007	-5.62889	15.9904	15.5447	15.4672	16.5582	16.7471	16.6096	15.6674	16.6383	0.970867
MYLK	HUMAN	MYLK	Myosin light chain kinase smooth muscle OS=Homo sapiens GN=MYLK PE=1 SV=4	24	24	+	Ctrl_LUZP1	2.26723	-0.877758	0.00540468	1.83752	-5.47828	14.8088	14.8775	14.3853	15.6439	15.5716	15.4893	14.6905	15.5683	0.877733
PCM1	HUMAN	PCM1	Pericentriolar material 1 protein OS=Homo sapiens GN=PCM1 PE=1 SV=4	10	10	+	Ctrl_LUZP1	2.25562	-1.37738	0.00555111	2.59796	-5.43781	10.9944	11.7056	10.9801	12.5555	12.7649	12.4919	11.2267	12.6041	1.3774
MA7D1	HUMAN	MAP7D1	MAP7 domain-containing protein 1 OS=Homo sapiens GN=MAP7D1 PE=1 SV=1	8	8	+	Ctrl_LUZP1	2.24706	-2.68963	0.00566161	6.45148	-5.40809	9.64746	9.79116	8.36632	11.5603	12.0668	12.2467	9.26831	11.9579	2.68962
KS6A1	HUMAN	RPS6KA1	Ribosomal protein S6 kinase alpha-1 OS=Homo sapiens GN=RPS6KA1 PE=1 SV=2	2	2	+	Ctrl_LUZP1	2.23808	-1.77208	0.0057799	3.41546	-5.37707	6.50302	6.76533	7.31288	8.27612	9.05528	8.56605	6.86041	8.63248	1.77207
FLNB	HUMAN	FLNB	Filamin-B OS=Homo sapiens GN=FLNB PE=1 SV=2	27	18	+	Ctrl_LUZP1	2.19048	-1.07069	0.00644941	2.10044	-5.21502	12.4014	12.1984	11.8994	13.3163	13.4383	12.9567	12.1664	13.2371	1.0707
TACC2	HUMAN	TACC2	Transforming acidic coiled-coil-containing protein 2 OS=Homo sapiens GN=TACC2 PE=1 SV=3	10	10	+	Ctrl_LUZP1	2.16515	-0.915789	0.00683675	1.8866	-5.13037	12.1196	11.7731	11.7607	12.5387	12.8784	12.9837	11.8845	12.8003	0.9158
CC85C	HUMAN	CCDC85C	Coiled-coil domain-containing protein 85C OS=Homo sapiens GN=CCDC85C PE=1 SV=1	4	4	+	Ctrl_LUZP1	2.15081	-3.1365	0.00706627	8.79388	-5.08293	7.41666	6.3425	8.41785	10.8218	10.3554	10.4094	7.39234	10.5289	3.13653
FGD4	HUMAN	FGD4	FYVE RhoGEF and PH domain-containing protein 4 OS=Homo sapiens GN=FGD4 PE=1 SV=2	3	3	+	Ctrl_LUZP1	2.14825	-1.38768	0.00710804	2.61658	-5.07448	8.8009	9.28077	8.63662	10.5793	10.3772	9.92481	8.9061	10.2938	1.38767
MYH9	HUMAN	MYH9	Myosin-9 OS=Homo sapiens GN=MYH9 PE=1 SV=4	79	67	+	Ctrl_LUZP1	2.12976	-1.29429	0.0074172	2.45256	-5.0139	16.6039	16.6382	16.0232	17.92	17.8361	17.392	16.4218	17.716	1.29427
SVIL	HUMAN	SVIL	Supervillin OS=Homo sapiens GN=SVIL PE=1 SV=2	14	14	+	Ctrl_LUZP1	2.07498	-0.948753	0.00841434	1.9302	-4.83767	11.2703	11.8803	11.6257	12.4486	12.464	12.7099	11.5921	12.5408	0.948733
CYTSA	HUMAN	SPECC1L	Cytospin-A OS=Homo sapiens GN=SPECC1L PE=1 SV=2	6	6	+	Ctrl_LUZP1	2.05232	-2.38185	0.00886503	5.21205	-4.76616	8.10852	9.34651	7.76155	10.5981	10.7142	11.0498	8.40553	10.7874	2.38184
VATA	HUMAN	ATP6V1A	V-type proton ATPase catalytic subunit A OS=Homo sapiens GN=ATP6V1A PE=1 SV=2	6	6	+	Ctrl_LUZP1	2.02481	-0.816876	0.00944474	1.76159	-4.68043	10.6618	10.4615	10.2992	11.1611	11.1421	11.5699	10.4742	11.291	0.816867
SYNPO	HUMAN	SYNPO	Synaptopodin OS=Homo sapiens GN=SYNPO PE=1 SV=2	7	7	+	Ctrl_LUZP1	1.96441	-2.44428	0.010854	5.44254	-4.49621	10.944	11.6618	9.83289	13.0802	13.2273	13.464	10.8129	13.2572	2.44427
NEDD1	HUMAN	NEDD1	Protein NEDD1 OS=Homo sapiens GN=NEDD1 PE=1 SV=1	8	8	+	Ctrl_LUZP1	1.89731	-0.912884	0.0126675	1.88281	-4.29781	10.4818	10.6883	10.4512	11.2877	11.2228	11.8494	10.5404	11.4533	0.912867
CYTSB	HUMAN	SPECC1	Cytospin-B OS=Homo sapiens GN=SPECC1 PE=1 SV=1	2	1	+	Ctrl_LUZP1	1.88963	-0.510157	0.0128935	1.42421	-4.27551	6.50562	6.21637	6.17768	6.79703	6.71425	6.91886	6.29989	6.81005	0.510157
ACTN4	HUMAN	ACTN4	Alpha-actinin-4 OS=Homo sapiens GN=ACTN4 PE=1 SV=2	24	19	+	Ctrl_LUZP1	1.87395	-1.1926	0.0133675	2.28564	-4.23025	12.3554	13.0067	13.1984	14.0362	14.2586	13.8435	12.8535	14.0461	1.1926
K1671	HUMAN	KIAA1671	Uncharacterized protein KIAA1671 OS=Homo sapiens GN=KIAA1671 PE=1 SV=2	8	8	+	Ctrl_LUZP1	1.84509	-0.910959	0.014286	1.88029	-4.14779	10.5216	11.1923	10.5981	11.5699	11.7607	11.7142	10.7707	11.6816	0.910933
ASAP2	HUMAN	ASAP2	Arf-GAP with SH3 domain ANK repeat and PH domain-containing protein 2 OS=Homo sapiens GN=ASAP2 PE=1 SV=3	3	3	+	Ctrl_LUZP1	1.84458	-2.64392	0.0143028	6.25028	-4.14634	6.16356	8.13955	7.54689	9.42206	10.1674	10.1923	7.28333	9.92725	2.64392
CT2NL	HUMAN	CTTNBP2NL	CTTNBP2 N-terminal-like protein OS=Homo sapiens GN=CTTNBP2NL PE=1 SV=2	9	9	+	Ctrl_LUZP1	1.83526	-0.789574	0.014613	1.72856	-4.11995	11.2819	11.2761	11.0566	11.6528	12.0868	12.2438	11.2049	11.9945	0.7896
EPN4	HUMAN	CLINT1	Clathrin interactor 1 OS=Homo sapiens GN=CLINT1 PE=1 SV=1	11	11	+	Ctrl_LUZP1	1.82343	-0.552046	0.0150165	1.46616	-4.08663	12.6595	12.5746	12.5579	13.2046	12.8994	13.3443	12.5973	13.1494	0.5521
DCTN1	HUMAN	DCTN1	Dynactin subunit 1 OS=Homo sapiens GN=DCTN1 PE=1 SV=3	2	1	+	Ctrl_LUZP1	1.82163	-0.985461	0.0150789	1.97995	-4.08159	7.19542	6.68303	6.63669	7.49985	7.98868	7.98299	6.83838	7.82384	0.98546
SYNCI	HUMAN	SYNC	Syncoilin OS=Homo sapiens GN=SYNC PE=1 SV=3	3	3	+	Ctrl_LUZP1	1.81426	-2.31858	0.015337	4.98841	-4.06092	8.35755	6.8913	8.19967	9.55651	10.1421	10.7056	7.81617	10.1347	2.31856
IF4B	HUMAN	EIF4B	Eukaryotic translation initiation factor 4B OS=Homo sapiens GN=EIF4B PE=1 SV=2	11	11	+	Ctrl_LUZP1	1.79109	-1.28914	0.0161774	2.44382	-3.99648	13.2393	13.6211	13.1658	14.1596	14.5746	15.1596	13.3421	14.6313	1.2892
PDLI5	HUMAN	PDLIM5	PDZ and LIM domain protein 5 OS=Homo sapiens GN=PDLIM5 PE=1 SV=5	19	19	+	Ctrl_LUZP1	1.78956	-1.61172	0.0162345	3.05616	-3.99224	13.7628	13.0785	13.0549	15.3581	14.2659	15.1074	13.2987	14.9105	1.61173
NACAM	HUMAN	NACA	Nascent polypeptide-associated complex subunit alpha muscle-specific form OS=Homo sapiens GN=NACA PE=1 SV=1	3	3	+	Ctrl_LUZP1	1.78597	-0.473264	0.0163693	1.38825	-3.98234	10.8918	11.2348	10.8918	11.42	11.5314	11.4868	11.0061	11.4794	0.473267
DAPK3	HUMAN	DAPK3	Death-associated protein kinase 3 OS=Homo sapiens GN=DAPK3 PE=1 SV=1	16	15	+	Ctrl_LUZP1	1.77403	-2.34057	0.0168256	5.06503	-3.94946	13.2273	13.3304	13.7099	16.3039	14.6154	16.3701	13.4225	15.7631	2.3406
SRBS2	HUMAN	SORBS2	Sorbin and SH3 domain-containing protein 2 OS=Homo sapiens GN=SORBS2 PE=1 SV=3	3	2	+	Ctrl_LUZP1	1.77141	-2.0021	0.0169274	4.00583	-3.94227	6.67493	6.25839	6.68882	8.86109	7.58496	9.18239	6.54071	8.54281	2.0021
PKN1	HUMAN	PKN1	Serine/threonine-protein kinase N1 OS=Homo sapiens GN=PKN1 PE=1 SV=2	6	5	+	Ctrl_LUZP1	1.71137	-2.50747	0.019437	5.68622	-3.77992	8.21917	6.94765	6.32078	9.41363	10.3772	9.21917	7.16253	9.67	2.50747
CD2AP	HUMAN	CD2AP	CD2-associated protein OS=Homo sapiens GN=CD2AP PE=1 SV=1	12	12	+	Ctrl_LUZP1	1.68098	-0.628524	0.0208459	1.54598	-3.69943	12.2615	12.1892	11.9766	12.4843	12.9694	12.8591	12.1424	12.7709	0.6285
NEXN	HUMAN	NEXN	Nexilin OS=Homo sapiens GN=NEXN PE=1 SV=1	15	15	+	Ctrl_LUZP1	1.67205	-0.561754	0.0212789	1.47606	-3.67597	13.9567	14.1752	14.2363	14.4448	14.7313	14.8775	14.1227	14.6845	0.5618
MAP4	HUMAN	MAP4	Microtubule-associated protein 4 OS=Homo sapiens GN=MAP4 PE=1 SV=3	64	64	+	Ctrl_LUZP1	1.67	-0.974197	0.0213796	1.96455	-3.67062	18.6523	18.4375	17.805	19.3034	19.3857	19.1282	18.2983	19.2724	0.974167
SEPT9	HUMAN	SEPT9	Septin-9 OS=Homo sapiens GN=SEPT9 PE=1 SV=2	22	21	+	Ctrl_LUZP1	1.64883	-0.946135	0.0224476	1.9267	-3.61544	13.8918	13.6211	13.7207	14.3163	14.5922	15.1635	13.7445	14.6907	0.946133
DREB	HUMAN	DBN1	Drebrin OS=Homo sapiens GN=DBN1 PE=1 SV=4	10	10	+	Ctrl_LUZP1	1.6431	-1.04511	0.0227457	2.06352	-3.60062	11.4041	11.2703	10.6073	11.9873	12.446	11.9837	11.0939	12.139	1.0451
IF4G2	HUMAN	EIF4G2	Eukaryotic translation initiation factor 4 gamma 2 OS=Homo sapiens GN=EIF4G2 PE=1 SV=1	12	12	+	Ctrl_LUZP1	1.60642	-1.19891	0.0247503	2.29566	-3.5065	10.7649	10.5216	10.1799	11.1163	12.1131	11.8337	10.4888	11.6877	1.1989
PAWR	HUMAN	PAWR	PRKC apoptosis WT1 regulator protein OS=Homo sapiens GN=PAWR PE=1 SV=1	9	8	+	Ctrl_LUZP1	1.57188	-1.64929	0.0267991	3.13679	-3.41922	10.5018	11.2644	10.0224	12.7545	11.6573	12.3247	10.5962	12.2455	1.6493
AFAP1	HUMAN	AFAP1	Actin filament-associated protein 1 OS=Homo sapiens GN=AFAP1 PE=1 SV=2	3	3	+	Ctrl_LUZP1	1.5616	-2.72314	0.027441	6.60308	-3.3935	9.87191	7.28112	7.81378	10.7731	11.1163	11.2467	8.32227	11.0454	2.7231
PP6R1	HUMAN	PPP6R1	Serine/threonine-protein phosphatase 6 regulatory subunit 1 OS=Homo sapiens GN=PPP6R1 PE=1 SV=5	5	5	+	Ctrl_LUZP1	1.52787	-1.10041	0.0296572	2.14416	-3.30989	10.7313	10.6883	9.77643	11.2935	11.697	11.5068	10.3987	11.4991	1.10042
PDLI3	HUMAN	PDLIM3	PDZ and LIM domain protein 3 OS=Homo sapiens GN=PDLIM3 PE=1 SV=1	2	2	+	Ctrl_LUZP1	1.47034	-1.22693	0.0338579	2.34068	-3.17001	11.5362	10.5603	10.6439	12.3078	11.6883	12.4252	10.9135	12.1404	1.22697
IDHC	HUMAN	IDH1	Isocitrate dehydrogenase [NADP] cytoplasmic OS=Homo sapiens GN=IDH1 PE=1 SV=2	3	3	+	Ctrl_LUZP1	1.46633	-1.01505	0.034172	2.02097	-3.16036	8.90087	8.04439	7.91289	9.32193	9.43671	9.14466	8.28605	9.3011	1.01505
RIPK1	HUMAN	RIPK1	Receptor-interacting serine/threonine-protein kinase 1 OS=Homo sapiens GN=RIPK1 PE=1 SV=3	2	2	+	Ctrl_LUZP1	1.44112	-2.24552	0.0362143	4.74208	-3.10019	6.51236	6.20936	5.50176	7.06609	8.59246	9.3015	6.07449	8.32002	2.24552
PP6R3	HUMAN	PPP6R3	Serine/threonine-protein phosphatase 6 regulatory subunit 3 OS=Homo sapiens GN=PPP6R3 PE=1 SV=2	3	3	+	Ctrl_LUZP1	1.43399	-1.33531	0.0368137	2.5233	-3.08328	9.79604	8.71425	8.43879	10.1033	10.5411	10.3106	8.98303	10.3183	1.33531
HAUS6	HUMAN	HAUS6	HAUS augmin-like complex subunit 6 OS=Homo sapiens GN=HAUS6 PE=1 SV=2	5	5	+	Ctrl_LUZP1	1.42234	-0.610103	0.0378146	1.52637	-3.05576	10.9293	10.8138	10.3106	11.1984	11.4094	11.2761	10.6846	11.2946	0.610067
ZCH18	HUMAN	ZC3H18	Zinc finger CCCH domain-containing protein 18 OS=Homo sapiens GN=ZC3H18 PE=1 SV=2	2	2	+	Ctrl_LUZP1	1.4177	-2.42246	0.0382208	5.36084	-3.04484	7.12871	7.0915	4.87845	8.23362	8.98014	9.15228	6.36622	8.78868	2.42246
CSDE1	HUMAN	CSDE1	Cold shock domain-containing protein E1 OS=Homo sapiens GN=CSDE1 PE=1 SV=2	6	6	+	Ctrl_LUZP1	1.40991	-0.362798	0.0389126	1.28592	-3.02653	11.2288	11.2819	10.9873	11.3772	11.6393	11.5699	11.166	11.5288	0.3628
FLNA	HUMAN	FLNA	Filamin-A OS=Homo sapiens GN=FLNA PE=1 SV=4	88	79	+	Ctrl_LUZP1	1.40221	-0.90221	0.0396086	1.86893	-3.0085	18.4576	18.2604	17.6311	19.2466	19.1155	18.6937	18.1164	19.0186	0.902233
PHLB1	HUMAN	PHLDB1	Pleckstrin homology-like domain family B member 1 OS=Homo sapiens GN=PHLDB1 PE=1 SV=1	7	7	+	Ctrl_LUZP1	1.39465	-1.52753	0.0403042	2.88292	-2.99084	10.42	9.63118	8.76155	11.3554	11.2586	10.7814	9.60424	11.1318	1.52756
PP6R2	HUMAN	PPP6R2	Serine/threonine-protein phosphatase 6 regulatory subunit 2 OS=Homo sapiens GN=PPP6R2 PE=1 SV=2	4	4	+	Ctrl_LUZP1	1.36877	-0.952427	0.0427789	1.93513	-2.93081	9.23601	9.12928	8.30378	9.78463	10.1033	9.63844	8.88969	9.84212	0.952433
ABLM3	HUMAN	ABLIM3	Actin-binding LIM protein 3 OS=Homo sapiens GN=ABLIM3 PE=1 SV=3	5	5	+	Ctrl_LUZP1	1.33914	-2.3031	0.0457994	4.93517	-2.86281	10.6618	8.90087	8.50779	12.2288	10.7566	11.9944	9.35682	11.6599	2.30311
RN214	HUMAN	RNF214	RING finger protein 214 OS=Homo sapiens GN=RNF214 PE=1 SV=2	4	4			1.29388	-0.902262	0.05083	1.86899	-2.76039	9.76984	9.72792	8.92481	10.2644	10.1421	10.7228	9.47419	10.3764	0.902243
PYC	HUMAN	PC	Pyruvate carboxylase mitochondrial OS=Homo sapiens GN=PC PE=1 SV=2	19	19			1.27844	-0.922172	0.0526696	1.89497	-2.72583	13.5018	12.8396	12.4944	14.0189	14.0447	13.5387	12.9453	13.8674	0.922167
CAMP1	HUMAN	CAMSAP1	Calmodulin-regulated spectrin-associated protein 1 OS=Homo sapiens GN=CAMSAP1 PE=1 SV=2	4	4			1.25594	-1.2804	0.0554702	2.42906	-2.67579	9.18239	8.32643	7.69349	9.79928	9.96578	9.27845	8.40077	9.68117	1.2804
RHG35	HUMAN	ARHGAP35	Rho GTPase-activating protein 35 OS=Homo sapiens GN=ARHGAP35 PE=1 SV=3	2	2			1.22194	-2.19659	0.0599874	4.58395	-2.60097	6.09923	5.6455	7.16993	9.42626	8.98014	7.09803	6.30489	8.50148	2.19659
KANK2	HUMAN	KANK2	KN motif and ankyrin repeat domain-containing protein 2 OS=Homo sapiens GN=KANK2 PE=1 SV=1	6	6			1.21191	-0.928375	0.0613889	1.90313	-2.57906	10.7977	10.4615	9.71596	10.9586	11.2703	11.5314	10.3251	11.2534	0.92838
SYNP2	HUMAN	SYNPO2	Synaptopodin-2 OS=Homo sapiens GN=SYNPO2 PE=1 SV=2	7	7			1.2057	-1.08169	0.062273	2.11651	-2.56552	10.0901	11.3219	11.2467	11.8765	11.7895	12.2378	10.8862	11.9679	1.0817
ABCF3	HUMAN	ABCF3	ATP-binding cassette sub-family F member 3 OS=Homo sapiens GN=ABCF3 PE=1 SV=2	4	4			1.16825	-1.2336	0.0678813	2.35153	-2.48453	7.65821	7.50779	7.17991	7.84549	8.70736	9.49386	7.44864	8.68224	1.2336
PPR18	HUMAN	PPP1R18	Phostensin OS=Homo sapiens GN=PPP1R18 PE=1 SV=1	6	6			1.16324	-1.64972	0.0686689	3.13773	-2.47376	10.2761	9.82496	8.11894	10.8765	11.2703	11.0224	9.40667	11.0564	1.64973
VINC	HUMAN	VCL	Vinculin OS=Homo sapiens GN=VCL PE=1 SV=4	22	22			1.15652	-0.464825	0.0697397	1.38015	-2.45935	13.412	13.464	13.06	13.5142	13.9926	13.8238	13.312	13.7769	0.464867
DDX3X	HUMAN	DDX3X	ATP-dependent RNA helicase DDX3X OS=Homo sapiens GN=DDX3X PE=1 SV=3	15	14			1.13301	-0.560256	0.073619	1.47453	-2.4092	12.6393	13.1627	12.5699	13.3581	13.1082	13.5864	12.7906	13.3509	0.560267
RPAP3	HUMAN	RPAP3	RNA polymerase II-associated protein 3 OS=Homo sapiens GN=RPAP3 PE=1 SV=2	4	4			1.0866	-0.673422	0.0819219	1.59485	-2.31122	9.53528	8.56605	8.99435	9.70217	9.56986	9.84392	9.03189	9.70532	0.673423
IASPP	HUMAN	PPP1R13L	RelA-associated inhibitor OS=Homo sapiens GN=PPP1R13L PE=1 SV=4	17	17			1.0859	-0.791326	0.082054	1.73066	-2.30976	13.7524	13.3718	12.6861	13.9293	14.3443	13.9106	13.2701	14.0614	0.7913
TARA	HUMAN	TRIOBP	TRIO and F-actin-binding protein OS=Homo sapiens GN=TRIOBP PE=1 SV=3	11	11			1.08428	-1.17305	0.0823607	2.25488	-2.30637	10.5216	11.6211	10.0362	11.5981	11.8297	12.2703	10.7263	11.8994	1.17307
TENS1	HUMAN	TNS1	Tensin-1 OS=Homo sapiens GN=TNS1 PE=1 SV=2	3	2			1.08411	-0.762554	0.0823929	1.69649	-2.306	8.25267	9.27146	8.45533	9.3443	9.28077	9.64205	8.65982	9.42237	0.762553
CNN2	HUMAN	CNN2	Calponin-2 OS=Homo sapiens GN=CNN2 PE=1 SV=4	5	4			1.07185	-1.71904	0.084752	3.29217	-2.28037	9.27146	9.91438	10.4615	12.3663	10.2644	12.1737	9.88245	11.6015	1.71902
ZO2	HUMAN	TJP2	Tight junction protein ZO-2 OS=Homo sapiens GN=TJP2 PE=1 SV=2	2	2			1.05924	-1.26471	0.0872489	2.40279	-2.25409	7.93074	6.29436	7.60733	8.09276	8.97154	8.56224	7.27748	8.54218	1.2647
CNN3	HUMAN	CNN3	Calponin-3 OS=Homo sapiens GN=CNN3 PE=1 SV=1	7	6			1.05864	-1.22595	0.0873695	2.33909	-2.25284	11.3498	10.9218	10.7977	12.3961	11.2877	13.0634	11.0231	12.2491	1.22597
FBLI1	HUMAN	FBLIM1	Filamin-binding LIM protein 1 OS=Homo sapiens GN=FBLIM1 PE=1 SV=2	6	6			1.04375	-1.9856	0.090417	3.96027	-2.22194	11.2046	11.1861	9.58308	12.7669	11.3498	13.8138	10.6579	12.6435	1.98557
PIBF1	HUMAN	PIBF1	Progesterone-induced-blocking factor 1 OS=Homo sapiens GN=PIBF1 PE=1 SV=2	10	10			1.03324	-0.741216	0.0926318	1.67158	-2.2002	11.2527	11.7398	10.6257	11.7524	12.0532	12.0362	11.2061	11.9473	0.7412
IGBP1	HUMAN	IGBP1	Immunoglobulin-binding protein 1 OS=Homo sapiens GN=IGBP1 PE=1 SV=1	3	3			1.03062	-0.986437	0.0931923	1.98129	-2.1948	9.27845	10.0901	8.91886	10.2167	10.0498	10.9801	9.42914	10.4155	0.986397
ARFG1	HUMAN	ARFGAP1	ADP-ribosylation factor GTPase-activating protein 1 OS=Homo sapiens GN=ARFGAP1 PE=1 SV=2	6	6			1.02252	-1.11904	0.0949467	2.17202	-2.1781	11.5216	11.1421	10.2644	12.5911	11.4094	12.2848	10.976	12.0951	1.11907
LRCH1	HUMAN	LRCH1	Leucine-rich repeat and calponin homology domain-containing protein 1 OS=Homo sapiens GN=LRCH1 PE=1 SV=3	2	2			1.01142	-1.50946	0.0974047	2.84703	-2.15527	6.84549	7.55459	6.32786	7.32193	9.40301	8.53138	6.90931	8.41877	1.50946
TGM2	HUMAN	TGM2	Protein-glutamine gamma-glutamyltransferase 2 OS=Homo sapiens GN=TGM2 PE=1 SV=2	10	10			0.992923	-0.464209	0.101643	1.37956	-2.11737	12.9622	12.5314	12.4893	12.9218	13.0154	13.4383	12.661	13.1252	0.4642
PDLI4	HUMAN	PDLIM4	PDZ and LIM domain protein 4 OS=Homo sapiens GN=PDLIM4 PE=1 SV=2	5	5			0.979194	-1.07058	0.104907	2.10028	-2.08935	12.1389	11.9181	11.1737	12.933	12.0327	13.4767	11.7436	12.8141	1.07057
SHIP2	HUMAN	INPPL1	Phosphatidylinositol 3 4 5-trisphosphate 5-phosphatase 2 OS=Homo sapiens GN=INPPL1 PE=1 SV=2	2	2			0.949529	-2.23828	0.112324	4.71834	-2.02913	6.20971	6.1169	9.43463	9.53138	9.18982	9.75489	7.25375	9.49203	2.23828
SPTB2	HUMAN	SPTBN1	Spectrin beta chain non-erythrocytic 1 OS=Homo sapiens GN=SPTBN1 PE=1 SV=2	2	1			0.943582	-0.835548	0.113872	1.78453	-2.01711	7.25015	8.27612	7.56986	8.7039	8.91588	7.98299	7.69871	8.53426	0.835547
RB6I2	HUMAN	ERC1	ELKS/Rab6-interacting/CAST family member 1 OS=Homo sapiens GN=ERC1 PE=1 SV=1	8	8			0.94243	-0.840088	0.114175	1.79016	-2.01478	9.46352	10.6073	10.2046	11.0293	11.3049	10.4615	10.0918	10.9319	0.840093
PDLI7	HUMAN	PDLIM7	PDZ and LIM domain protein 7 OS=Homo sapiens GN=PDLIM7 PE=1 SV=1	10	10			0.941458	-1.51314	0.114431	2.85431	-2.01282	12.3581	12.2167	10.6165	13.8918	12.2527	13.5864	11.7304	13.2436	1.5132
RHG29	HUMAN	ARHGAP29	Rho GTPase-activating protein 29 OS=Homo sapiens GN=ARHGAP29 PE=1 SV=2	7	7			0.914238	-0.942962	0.121832	1.92247	-1.95801	11.5555	10.4409	9.93811	11.5167	11.5411	11.7056	10.6448	11.5878	0.942963
TENS3	HUMAN	TNS3	Tensin-3 OS=Homo sapiens GN=TNS3 PE=1 SV=2	3	2			0.894408	-0.653118	0.127524	1.57256	-1.91828	9.41151	9.3015	8.47978	9.66889	9.44708	10.0362	9.06426	9.71739	0.653127
NDE1	HUMAN	NDE1	Nuclear distribution protein nudE homolog 1 OS=Homo sapiens GN=NDE1 PE=1 SV=2	5	3			0.841518	-0.541612	0.14404	1.4556	-1.81303	9.36194	9.32868	9.02237	9.81858	9.27845	10.2408	9.23766	9.77928	0.541613
ICAL	HUMAN	CAST	Calpastatin OS=Homo sapiens GN=CAST PE=1 SV=4	5	5			0.821174	-0.644953	0.150948	1.56369	-1.77279	10.2877	9.33762	9.32868	10.0224	10.2408	10.6257	9.65133	10.2963	0.644967
MOES	HUMAN	MSN	Moesin OS=Homo sapiens GN=MSN PE=1 SV=3	8	3			0.799878	-0.998112	0.158534	1.99738	-1.7308	7.65821	8.42626	8.83289	8.71768	8.97728	10.2167	8.30579	9.30389	0.9981
SPG20	HUMAN	SPG20	Spartin OS=Homo sapiens GN=SPG20 PE=1 SV=1	2	2			0.790116	-1.40646	0.162138	2.65086	-1.71159	9.08481	6.4443	8.5157	9.15228	9.35535	9.75656	8.01494	9.4214	1.40646
ENPL	HUMAN	HSP90B1	Endoplasmin OS=Homo sapiens GN=HSP90B1 PE=1 SV=1	5	3			0.78886	-1.00439	0.162607	2.0061	-1.70912	8.19476	7.13132	7.14975	7.56224	8.85798	9.06878	7.49194	8.49633	1.00439
AAK1	HUMAN	AAK1	AP2-associated protein kinase 1 OS=Homo sapiens GN=AAK1 PE=1 SV=3	11	11			0.788589	-1.32126	0.162709	2.49884	-1.70859	11.5507	11.5018	9.21189	12.0084	12.1768	12.043	10.7548	12.0761	1.32127
CEP97	HUMAN	CEP97	Centrosomal protein of 97 kDa OS=Homo sapiens GN=CEP97 PE=1 SV=1	8	8			0.777102	-0.420357	0.16707	1.33826	-1.68603	11.2167	11.2992	11.1923	11.2877	11.5555	12.1261	11.2361	11.6564	0.420367
RAPH1	HUMAN	RAPH1	Ras-associated and pleckstrin homology domains-containing protein 1 OS=Homo sapiens GN=RAPH1 PE=1 SV=3	2	2			0.775683	-0.822038	0.167617	1.7679	-1.68324	9.5411	7.8646	8.61839	9.61471	9.43254	9.44294	8.6747	9.49673	0.822033
DBNL	HUMAN	DBNL	Drebrin-like protein OS=Homo sapiens GN=DBNL PE=1 SV=1	6	6			0.774965	-3.00021	0.167894	8.00116	-1.68183	10.2408	8.17991	4.54268	11.0835	9.39874	11.4818	7.65446	10.6547	3.00022
NEB2	HUMAN	PPP1R9B	Neurabin-2 OS=Homo sapiens GN=PPP1R9B PE=1 SV=2	2	2			0.767395	-1.20002	0.170846	2.29743	-1.66698	6.31487	7.92481	8.01681	8.04439	8.28077	9.53138	7.41883	8.61885	1.20002
CE152	HUMAN	CEP152	Centrosomal protein of 152 kDa OS=Homo sapiens GN=CEP152 PE=1 SV=4	2	2			0.751211	-1.43751	0.177333	2.70853	-1.63527	9.33316	6.62389	8.76487	9.17991	9.62571	10.2288	8.24064	9.67814	1.4375
AKAP2	HUMAN	AKAP2	A-kinase anchor protein 2 OS=Homo sapiens GN=AKAP2 PE=1 SV=3	4	4			0.712367	-0.50856	0.193925	1.42263	-1.55934	10.3554	10.4717	9.58308	10.3332	10.9144	10.6883	10.1367	10.6453	0.508573
LASP1	HUMAN	LASP1	LIM and SH3 domain protein 1 OS=Homo sapiens GN=LASP1 PE=1 SV=2	12	12			0.711378	-0.966552	0.194367	1.95416	-1.55741	13.5507	14.2877	12.4993	14.5981	13.7524	14.887	13.4459	14.4125	0.9666
TLN1	HUMAN	TLN1	Talin-1 OS=Homo sapiens GN=TLN1 PE=1 SV=3	25	25			0.708931	-0.461254	0.195465	1.37674	-1.55264	14.2213	13.5387	13.3021	13.9293	14.2877	14.2288	13.6874	14.1486	0.461233
KIF11	HUMAN	KIF11	Kinesin-like protein KIF11 OS=Homo sapiens GN=KIF11 PE=1 SV=2	2	1			0.697576	-1.83566	0.200643	3.56935	-1.53049	5.75359	7.75431	5.31981	9.47371	8.54303	6.31795	6.2759	8.11156	1.83566
CEP85	HUMAN	CEP85	Centrosomal protein of 85 kDa OS=Homo sapiens GN=CEP85 PE=1 SV=1	2	2			0.676047	-0.551403	0.21084	1.46551	-1.48852	9.21189	10.0634	8.9629	9.70908	10.2644	9.91886	9.41273	9.96411	0.551383
MYO1E	HUMAN	MYO1E	Unconventional myosin-Ie OS=Homo sapiens GN=MYO1E PE=1 SV=2	5	5			0.660474	-0.651992	0.218538	1.57134	-1.45819	11.1163	9.72962	10.1674	10.8138	10.8057	11.3498	10.3378	10.9898	0.651993
PP2BA	HUMAN	PPP3CA	Serine/threonine-protein phosphatase 2B catalytic subunit alpha isoform OS=Homo sapiens GN=PPP3CA PE=1 SV=1	2	2			0.657705	-0.70724	0.219935	1.63268	-1.45279	8.43463	9.00562	7.87036	9.55075	8.42626	9.45533	8.43687	9.14411	0.707243
PTN12	HUMAN	PTPN12	Tyrosine-protein phosphatase non-receptor type 12 OS=Homo sapiens GN=PTPN12 PE=1 SV=3	3	3			0.648797	-0.478638	0.224493	1.39343	-1.43544	8.55459	8.73132	9.37938	8.95128	9.6987	9.45121	8.88843	9.36706	0.478633
NUMBL	HUMAN	NUMBL	Numb-like protein OS=Homo sapiens GN=NUMBL PE=1 SV=1	2	2			0.646028	-1.16024	0.225929	2.23495	-1.43005	8.65464	6.90503	9.49185	9.01681	9.53528	9.98014	8.35051	9.51074	1.16024
EXOC4	HUMAN	EXOC4	Exocyst complex component 4 OS=Homo sapiens GN=EXOC4 PE=1 SV=1	4	4			0.643745	-0.784155	0.22712	1.72208	-1.42561	8.17493	8.26209	9.05257	8.59991	9.04985	10.1923	8.49653	9.28069	0.784157
FINC	HUMAN	FN1	Fibronectin OS=Homo sapiens GN=FN1 PE=1 SV=4	11	11			0.634585	-0.513316	0.231961	1.42733	-1.40777	11.8376	12.0967	11.2703	12.3961	12.6257	11.7228	11.7349	12.2482	0.513333
RAI14	HUMAN	RAI14	Ankycorbin OS=Homo sapiens GN=RAI14 PE=1 SV=2	10	10			0.621022	-0.438143	0.239319	1.35486	-1.38135	12.158	12.2107	11.3332	12.3163	12.5934	12.1066	11.9006	12.3388	0.438133
PPME1	HUMAN	PPME1	Protein phosphatase methylesterase 1 OS=Homo sapiens GN=PPME1 PE=1 SV=3	4	4			0.599933	-1.64261	0.251227	3.1223	-1.34025	9.99435	8.60363	5.90171	10.2527	9.41996	9.75489	8.16656	9.80918	1.64262
CEP41	HUMAN	CEP41	Centrosomal protein of 41 kDa OS=Homo sapiens GN=CEP41 PE=1 SV=1	2	2			0.547605	-0.806615	0.283397	1.7491	-1.23805	7.85798	7.07864	7.31288	7.57743	7.65105	9.44087	7.4165	8.22312	0.806617
CO052	HUMAN	C15orf52	Uncharacterized protein C15orf52 OS=Homo sapiens GN=C15orf52 PE=1 SV=1	4	4			0.541312	-1.16151	0.287533	2.23691	-1.22572	10.1293	10.7482	7.8009	10.7482	10.1799	11.2348	9.55947	10.721	1.1615
SHOT1	HUMAN	SHTN1	Shootin-1 OS=Homo sapiens GN=SHTN1 PE=1 SV=4	2	2			0.539434	-0.723777	0.288779	1.6515	-1.22204	10.3332	8.67596	9.98014	10.9801	10.2527	9.92778	9.6631	10.3869	0.72376
CTNA1	HUMAN	CTNNA1	Catenin alpha-1 OS=Homo sapiens GN=CTNNA1 PE=1 SV=1	4	4			0.526945	-0.315664	0.297204	1.24458	-1.19755	9.35535	8.83605	8.7039	9.40088	9.50184	8.93958	8.9651	9.28077	0.315667
SEPT2	HUMAN	SEPT2	Septin-2 OS=Homo sapiens GN=SEPT2 PE=1 SV=1	5	4			0.523432	-0.557591	0.299618	1.47181	-1.19065	10.8455	10.2167	9.34651	10.7895	10.3554	10.9366	10.1362	10.6938	0.557597
HS71B	HUMAN	HSPA1B	Heat shock 70 kDa protein 1B OS=Homo sapiens GN=HSPA1B PE=1 SV=1	6	1			0.522256	-0.70336	0.30043	1.62829	-1.18834	6.45802	7.14832	8.40939	7.82018	7.96578	8.33985	7.33858	8.04194	0.70336
SEPT7	HUMAN	SEPT7	Septin-7 OS=Homo sapiens GN=SEPT7 PE=1 SV=2	8	8			0.511771	-0.523072	0.307772	1.43701	-1.16773	12.0934	11.5699	11.0967	12.1485	11.4969	12.6839	11.5867	12.1098	0.5231
YJ005	HUMAN	2 SV	Uncharacterized protein FLJ45252 OS=Homo sapiens PE=2 SV=2	6	6			0.494384	-0.365328	0.320344	1.28817	-1.13348	11.9293	11.4041	10.8994	11.8098	11.5459	11.973	11.4109	11.7762	0.3653
TPM2	HUMAN	TPM2	Tropomyosin beta chain OS=Homo sapiens GN=TPM2 PE=1 SV=1	9	3			0.493547	-0.701901	0.320962	1.62665	-1.13182	8.90689	8.30834	9.41996	8.90087	9.21432	10.6257	8.8784	9.5803	0.7019
CYLD	HUMAN	CYLD	Ubiquitin carboxyl-terminal hydrolase CYLD OS=Homo sapiens GN=CYLD PE=1 SV=1	3	3			0.490384	-0.643565	0.323308	1.56218	-1.12558	8.56605	10.0768	8.84862	9.92035	10.3219	9.17991	9.16382	9.80739	0.643563
BAG3	HUMAN	BAG3	BAG family molecular chaperone regulator 3 OS=Homo sapiens GN=BAG3 PE=1 SV=3	2	2			0.477984	-0.518298	0.332672	1.43226	-1.10106	9.07948	8.33092	9.41574	8.77149	9.783	9.82655	8.94205	9.46035	0.5183
STK38	HUMAN	STK38	Serine/threonine-protein kinase 38 OS=Homo sapiens GN=STK38 PE=1 SV=1	3	3			0.467966	-0.941664	0.340435	1.92074	-1.08121	9.20212	8.56986	6.98868	9.42206	8.11374	10.0498	8.25355	9.1952	0.941647
DAB2	HUMAN	DAB2	Disabled homolog 2 OS=Homo sapiens GN=DAB2 PE=1 SV=3	7	7			0.465327	-0.34852	0.34251	1.27325	-1.07597	11.5934	10.6073	11.0901	11.1421	11.6484	11.5459	11.0969	11.4455	0.348533
SKT	HUMAN	KIAA1217	Sickle tail protein homolog OS=Homo sapiens GN=KIAA1217 PE=1 SV=2	6	6			0.45325	-0.354463	0.352168	1.27851	-1.05196	10.973	9.82337	10.5216	10.8138	10.7142	10.8533	10.4393	10.7938	0.354443
E41L1	HUMAN	EPB41L1	Band 4.1-like protein 1 OS=Homo sapiens GN=EPB41L1 PE=1 SV=2	9	9			0.443716	-0.469576	0.359985	1.3847	-1.03295	10.7228	10.1674	10.7977	10.2167	11.4919	11.388	10.5626	11.0322	0.469567
ERF3A	HUMAN	GSPT1	Eukaryotic peptide chain release factor GTP-binding subunit ERF3A OS=Homo sapiens GN=GSPT1 PE=1 SV=1	3	3			0.440225	-0.308945	0.36289	1.2388	-1.02598	10.2992	10.2046	9.40088	10.1799	10.4717	10.1799	9.96823	10.2772	0.30894
ERC6L	HUMAN	ERCC6L	DNA excision repair protein ERCC-6-like OS=Homo sapiens GN=ERCC6L PE=1 SV=1	3	3			0.434404	-0.565201	0.367787	1.47959	-1.01434	9.23362	9.44087	7.67948	9.42836	9.31515	9.30606	8.78466	9.34986	0.5652
FOXO3	HUMAN	FOXO3	Forkhead box protein O3 OS=Homo sapiens GN=FOXO3 PE=1 SV=1	2	2			0.432441	-1.01186	0.369453	2.01651	-1.01042	10.1548	7.15987	10.0084	9.71768	10.1293	10.5118	9.10769	10.1196	1.0119
SC16A	HUMAN	SEC16A	Protein transport protein Sec16A OS=Homo sapiens GN=SEC16A PE=1 SV=3	5	5			0.424807	-0.190267	0.376004	1.14097	-0.995112	11.1357	11.0224	10.5411	11.0014	11.1984	11.0701	10.8997	11.09	0.190233
UBA1	HUMAN	UBA1	Ubiquitin-like modifier-activating enzyme 1 OS=Homo sapiens GN=UBA1 PE=1 SV=3	2	2			0.424244	-0.433606	0.376492	1.35061	-0.993983	9.21189	8.48784	7.7879	8.70736	8.87652	9.20457	8.49588	8.92948	0.433607
MA7D3	HUMAN	MAP7D3	MAP7 domain-containing protein 3 OS=Homo sapiens GN=MAP7D3 PE=1 SV=2	15	15			0.40249	-0.141339	0.395831	1.10293	-0.950169	14.2438	14.2438	14.0102	14.2213	14.1437	14.5567	14.1659	14.3072	0.1413
KINH	HUMAN	KIF5B	Kinesin-1 heavy chain OS=Homo sapiens GN=KIF5B PE=1 SV=1	12	9			0.395717	-0.361158	0.402053	1.28446	-0.936462	11.7607	11.1163	10.7313	11.0967	11.9069	11.6883	11.2028	11.564	0.3612
TB182	HUMAN	TNKS1BP1	182 kDa tankyrase-1-binding protein OS=Homo sapiens GN=TNKS1BP1 PE=1 SV=4	8	8			0.389355	-0.27682	0.407986	1.21152	-0.923557	12.4041	12.3799	11.6484	12.5043	12.6618	12.0967	12.1441	12.4209	0.2768
STAT1	HUMAN	STAT1	Signal transducer and activator of transcription 1-alpha/beta OS=Homo sapiens GN=STAT1 PE=1 SV=2	13	13			0.384597	-0.128914	0.41248	1.09347	-0.913887	12.6817	12.5887	12.3163	12.5043	12.6573	12.8118	12.5289	12.6578	0.1289
COR1C	HUMAN	CORO1C	Coronin-1C OS=Homo sapiens GN=CORO1C PE=1 SV=1	4	4			0.376109	-0.816166	0.420621	1.76072	-0.89659	11.2107	10.5507	8.86728	11.3276	9.89633	11.8533	10.2096	11.0257	0.816183
EPN1	HUMAN	EPN1	Epsin-1 OS=Homo sapiens GN=EPN1 PE=1 SV=2	3	3			0.371717	-0.252175	0.424896	1.191	-0.887618	9.60548	9.85019	9.24555	9.41996	9.84549	10.1923	9.56707	9.81925	0.252177
VIGLN	HUMAN	HDLBP	Vigilin OS=Homo sapiens GN=HDLBP PE=1 SV=2	9	9			0.368569	-0.401968	0.427987	1.32131	-0.881176	12.2408	12.3134	10.9293	12.2258	12.3636	12.1	11.8278	12.2298	0.401967
SNX9	HUMAN	SNX9	Sorting nexin-9 OS=Homo sapiens GN=SNX9 PE=1 SV=1	6	6			0.368262	-0.463556	0.42829	1.37894	-0.880547	10.3332	9.17742	10.8376	10.5793	10.2527	10.9069	10.1161	10.5796	0.46356
BCAR1	HUMAN	BCAR1	Breast cancer anti-estrogen resistance protein 1 OS=Homo sapiens GN=BCAR1 PE=1 SV=2	5	5			0.365484	-0.814795	0.431038	1.75905	-0.874855	10.2992	10.5981	7.81378	9.82814	10.4818	10.8455	9.57036	10.3851	0.814787
TRIP6	HUMAN	TRIP6	Thyroid receptor-interacting protein 6 OS=Homo sapiens GN=TRIP6 PE=1 SV=3	3	3			0.362347	-0.627462	0.434163	1.54484	-0.868422	8.79442	9.66889	7.3837	9.77479	8.82018	9.13443	8.61567	9.24313	0.627463
STRN	HUMAN	STRN	Striatin OS=Homo sapiens GN=STRN PE=1 SV=4	5	5			0.353425	-0.497727	0.443175	1.41199	-0.85007	10.5887	8.72451	9.76155	9.78136	10.5699	10.2167	9.69159	10.1893	0.497733
TWF1	HUMAN	TWF1	Twinfilin-1 OS=Homo sapiens GN=TWF1 PE=1 SV=3	3	2			0.345255	-0.960835	0.451591	1.94644	-0.833202	9.84392	6.33449	8.65821	9.60363	8.21917	9.89633	8.27887	9.23971	0.960837
TES	HUMAN	TES	Testin OS=Homo sapiens GN=TES PE=1 SV=1	3	3			0.342599	-0.556391	0.454361	1.47059	-0.827706	10.0084	10.1163	9.91588	10.6883	9.35535	11.6662	10.0135	10.57	0.556423
AGFG1	HUMAN	AGFG1	Arf-GAP domain and FG repeat-containing protein 1 OS=Homo sapiens GN=AGFG1 PE=1 SV=2	10	10			0.337484	-0.491743	0.459744	1.40614	-0.817098	14.0532	13.3443	12.6416	14.3987	12.964	14.1517	13.3464	13.8381	0.491767
SYNJ2	HUMAN	SYNJ2	Synaptojanin-2 OS=Homo sapiens GN=SYNJ2 PE=1 SV=3	4	4			0.316661	-0.285458	0.482324	1.2188	-0.773638	11.1163	10.2527	9.96145	10.4919	10.9218	10.7731	10.4435	10.7289	0.28545
ZMYM3	HUMAN	ZMYM3	Zinc finger MYM-type protein 3 OS=Homo sapiens GN=ZMYM3 PE=1 SV=2	2	2			0.304989	-0.945303	0.495463	1.92559	-0.749067	8.86419	8.73132	5.99313	7.18982	10.0498	9.18488	7.86288	8.80817	0.945287
PICAL	HUMAN	PICALM	Phosphatidylinositol-binding clathrin assembly protein OS=Homo sapiens GN=PICALM PE=1 SV=2	11	11			0.298021	-0.371013	0.503476	1.29326	-0.734322	13.8533	13.3987	12.9476	14.0447	12.9237	14.3443	13.3999	13.7709	0.371033
AFAD	HUMAN	MLLT4	Afadin OS=Homo sapiens GN=MLLT4 PE=1 SV=3	4	4			0.296341	-0.428649	0.505428	1.34597	-0.730757	9.09011	10.7977	9.46352	10.0498	10.7482	9.8392	9.78378	10.2124	0.428623
CO1A1	HUMAN	COL1A1	Collagen alpha-1(I) chain OS=Homo sapiens GN=COL1A1 PE=1 SV=5	3	2			0.273624	-0.377241	0.532569	1.29886	-0.682201	6.88901	6.18938	7.43463	6.54754	7.98868	7.10852	6.83767	7.21491	0.37724
ABR	HUMAN	ABR	Active breakpoint cluster region-related protein OS=Homo sapiens GN=ABR PE=2 SV=2	2	2			0.272413	-0.146886	0.534056	1.10718	-0.679592	9.69	9.11114	9.40514	9.35094	9.81218	9.48382	9.40209	9.54898	0.146887
NEK9	HUMAN	NEK9	Serine/threonine-protein kinase Nek9 OS=Homo sapiens GN=NEK9 PE=1 SV=2	2	2			0.266795	-0.393731	0.54101	1.31379	-0.667465	9.26913	9.10329	7.45943	9.11374	9.13443	8.76487	8.61062	9.00435	0.39373
ERBIN	HUMAN	ERBIN	Erbin OS=Homo sapiens GN=ERBIN PE=1 SV=2	2	2			0.260447	-0.246323	0.548976	1.18618	-0.653706	8.51175	8.02791	7.52356	8.75822	8.05528	7.98868	8.02107	8.26739	0.24632
M21D2	HUMAN	MB21D2	Protein MB21D2 OS=Homo sapiens GN=MB21D2 PE=1 SV=3	7	7			0.250046	-0.404919	0.562282	1.32401	-0.631029	11.7773	10.5411	9.81057	11.42	10.5411	11.3826	10.7097	11.1146	0.40491
TANK	HUMAN	TANK	TRAF family member-associated NF-kappa-B activator OS=Homo sapiens GN=TANK PE=1 SV=2	7	7			0.246489	-0.501872	0.566906	1.41605	-0.623235	11.3049	10.6528	9.35535	11.6662	9.82496	11.3276	10.4377	10.9396	0.501903
EFL1	HUMAN	EFL1	Elongation factor-like GTPase 1 OS=Homo sapiens GN=EFL1 PE=1 SV=2	2	2			0.243357	-0.650503	0.571009	1.56972	-0.616352	7.81461	6.63234	7.84549	7.90087	6.48666	9.85643	7.43081	8.08132	0.650507
XIAP	HUMAN	XIAP	E3 ubiquitin-protein ligase XIAP OS=Homo sapiens GN=XIAP PE=1 SV=2	2	2			0.238253	-0.375054	0.577759	1.29689	-0.605107	7.67948	7.65664	7.85798	8.13955	7.02237	9.15735	7.73137	8.10642	0.375057
INCE	HUMAN	INCENP	Inner centromere protein OS=Homo sapiens GN=INCENP PE=1 SV=3	2	2			0.23641	-1.21289	0.580216	2.31802	-0.601033	10.5118	11.0901	5.18844	10.5507	11.1674	8.71081	8.93011	10.143	1.21286
STAT2	HUMAN	STAT2	Signal transducer and activator of transcription 2 OS=Homo sapiens GN=STAT2 PE=1 SV=1	3	3			0.22813	-0.27681	0.591385	1.21151	-0.582666	9.633	10.3772	8.83289	9.69523	10.2167	9.76155	9.61436	9.89116	0.276797
TRI25	HUMAN	TRIM25	E3 ubiquitin/ISG15 ligase TRIM25 OS=Homo sapiens GN=TRIM25 PE=1 SV=2	3	3			0.224279	-0.411195	0.596652	1.32979	-0.57408	9.61102	9.2503	7.87652	9.68475	8.36632	9.92035	8.91261	9.32381	0.411193
TFCP2	HUMAN	TFCP2	Alpha-globin transcription factor CP2 OS=Homo sapiens GN=TFCP2 PE=1 SV=2	2	2			0.220482	-0.908823	0.601891	1.87751	-0.56559	9.83605	6.90845	5.2613	9.26209	6.47017	9	7.33527	8.24409	0.90882
LARP1	HUMAN	LARP1	La-related protein 1 OS=Homo sapiens GN=LARP1 PE=1 SV=2	5	5			0.219841	-0.297014	0.60278	1.2286	-0.564154	11.2348	10.9586	9.55459	10.9218	10.9944	10.7228	10.5827	10.8797	0.297003
ALMS1	HUMAN	ALMS1	Alstrom syndrome protein 1 OS=Homo sapiens GN=ALMS1 PE=1 SV=3	3	3			0.212698	-0.329913	0.612776	1.25694	-0.548098	9.80413	9.09803	8.58871	9.83289	8.53138	10.1163	9.16362	9.49352	0.3299
CDC37	HUMAN	CDC37	Hsp90 co-chaperone Cdc37 OS=Homo sapiens GN=CDC37 PE=1 SV=1	4	4			0.207087	-0.396107	0.620745	1.31595	-0.535416	11.3934	10.4919	10.4717	11.5699	9.86882	12.1066	10.7857	11.1818	0.396107
TCPZ	HUMAN	CCT6A	T-complex protein 1 subunit zeta OS=Homo sapiens GN=CCT6A PE=1 SV=3	2	2			0.206936	-0.549726	0.620961	1.46381	-0.535073	7.92481	7.20909	5.27029	8.48382	6.22083	7.34873	6.8014	7.35113	0.54973
SI1L3	HUMAN	SIPA1L3	Signal-induced proliferation-associated 1-like protein 3 OS=Homo sapiens GN=SIPA1L3 PE=1 SV=3	2	2			0.193255	-0.388919	0.640833	1.30941	-0.503877	7.63083	8.14466	7.75489	6.76818	8.63662	9.29232	7.84346	8.23237	0.388913
SH3K1	HUMAN	SH3KBP1	SH3 domain-containing kinase-binding protein 1 OS=Homo sapiens GN=SH3KBP1 PE=1 SV=2	5	5			0.190865	-0.182339	0.64437	1.13472	-0.498389	10.5887	10.4094	9.49985	10.2644	10.1548	10.6257	10.166	10.3483	0.182317
DFNA5	HUMAN	DFNA5	Non-syndromic hearing impairment protein 5 OS=Homo sapiens GN=DFNA5 PE=1 SV=2	7	7			0.190613	-0.222496	0.644744	1.16675	-0.497808	11.6528	11.4666	10.2877	11.3772	11.1228	11.5746	11.1357	11.3582	0.2225
ZCCHV	HUMAN	ZC3HAV1	Zinc finger CCCH-type antiviral protein 1 OS=Homo sapiens GN=ZC3HAV1 PE=1 SV=3	4	4			0.180679	-0.403172	0.659661	1.32241	-0.474846	9.51373	9.40301	7.62936	8.19967	9.31515	10.2408	8.8487	9.25187	0.403173
SLAI2	HUMAN	SLAIN2	SLAIN motif-containing protein 2 OS=Homo sapiens GN=SLAIN2 PE=1 SV=2	3	3			0.17563	-0.148733	0.667375	1.1086	-0.463089	9.65642	10.4409	9.70563	9.7211	10.3987	10.1293	9.93432	10.083	0.148717
TSPY8	HUMAN	TSPY8	Testis-specific Y-encoded protein 8 OS=Homo sapiens GN=TSPY8 PE=3 SV=2	2	1			0.163751	-0.428978	0.685881	1.34628	-0.435184	6.93554	6.87285	6.39859	8.28077	5.23014	7.98299	6.73566	7.16463	0.428973
EPS15	HUMAN	EPS15	Epidermal growth factor receptor substrate 15 OS=Homo sapiens GN=EPS15 PE=1 SV=2	6	6			0.157706	-0.223311	0.695495	1.16741	-0.420847	11.5411	9.99435	9.96578	10.6439	10.9293	10.5981	10.5004	10.7238	0.223357
HS105	HUMAN	HSPH1	Heat shock protein 105 kDa OS=Homo sapiens GN=HSPH1 PE=1 SV=1	2	2			0.157676	-0.33707	0.695543	1.26319	-0.420773	8.16491	7.5157	8.3966	6.85798	9.2503	8.98014	8.02574	8.36281	0.33707
CHMP7	HUMAN	CHMP7	Charged multivesicular body protein 7 OS=Homo sapiens GN=CHMP7 PE=1 SV=1	2	2			0.155039	-0.311302	0.699779	1.24083	-0.414491	9.98014	7.69349	8.2384	9.09803	8.37504	9.37286	8.63734	8.94864	0.3113
COPB2	HUMAN	COPB2	Coatomer subunit beta' OS=Homo sapiens GN=COPB2 PE=1 SV=2	6	6			0.148955	-0.203494	0.709651	1.15148	-0.399921	11.0835	9.62753	11.0224	10.9873	10.9366	10.42	10.5778	10.7813	0.20349
IST1	HUMAN	IST1	IST1 homolog OS=Homo sapiens GN=IST1 PE=1 SV=1	5	5			0.13944	-0.225803	0.725371	1.16943	-0.376929	12.4944	12.1196	11.0293	12.2408	11.3443	12.7356	11.8811	12.1069	0.2258
PNPH	HUMAN	PNP	Purine nucleoside phosphorylase OS=Homo sapiens GN=PNP PE=1 SV=2	3	3			0.129773	-0.444741	0.741698	1.36107	-0.3533	7.90689	6.26207	8.44294	7.12928	10.1163	6.7005	7.5373	7.98203	0.444727
ARP2	HUMAN	ACTR2	Actin-related protein 2 OS=Homo sapiens GN=ACTR2 PE=1 SV=1	2	2			0.12781	-0.355539	0.745058	1.27946	-0.348465	9.38802	7.03685	8.84862	8.9542	7.43463	9.95128	8.4245	8.78004	0.35554
CPIN1	HUMAN	CIAPIN1	Anamorsin OS=Homo sapiens GN=CIAPIN1 PE=1 SV=2	6	5			0.124839	-0.219387	0.750172	1.16424	-0.341128	11.5314	10.8765	10.0901	11.1923	10.1421	11.8218	10.8327	11.0521	0.2194
ARFG2	HUMAN	ARFGAP2	ADP-ribosylation factor GTPase-activating protein 2 OS=Homo sapiens GN=ARFGAP2 PE=1 SV=1	2	2			0.119051	-0.265814	0.760237	1.20231	-0.326753	7.75489	8.13955	7.75651	9.31288	6.60803	8.52748	7.88365	8.14946	0.265813
EHD1	HUMAN	EHD1	EH domain-containing protein 1 OS=Homo sapiens GN=EHD1 PE=1 SV=2	10	10			0.117806	-0.23105	0.76242	1.17369	-0.323648	11.9031	11.3826	10.4818	12.1799	10.3332	11.9476	11.2558	11.4869	0.231067
SAHH	HUMAN	AHCY	Adenosylhomocysteinase OS=Homo sapiens GN=AHCY PE=1 SV=4	3	3			0.111825	-0.208537	0.772992	1.15552	-0.308655	11.42	11.3826	9.92481	11.3387	10.2288	11.7855	10.9091	11.1177	0.20853
CHM2B	HUMAN	CHMP2B	Charged multivesicular body protein 2b OS=Homo sapiens GN=CHMP2B PE=1 SV=1	2	2			0.10534	-0.145928	0.784621	1.10644	-0.292258	9.56986	9.36851	9.40727	8.86728	9.37504	10.5411	9.44855	9.59447	0.145927
SRGP1	HUMAN	SRGAP1	SLIT-ROBO Rho GTPase-activating protein 1 OS=Homo sapiens GN=SRGAP1 PE=1 SV=1	2	2			0.0931254	-0.114863	0.807002	1.08287	-0.260968	9.71939	9.50581	8.60363	8.84235	9.73302	9.59805	9.27628	9.39114	0.114863
TMOD3	HUMAN	TMOD3	Tropomodulin-3 OS=Homo sapiens GN=TMOD3 PE=1 SV=1	11	11			0.0832163	-0.10325	0.825627	1.07419	-0.235169	13.0481	12.7356	12.1421	12.9385	12.0668	13.2303	12.6419	12.7452	0.103267
AHNK	HUMAN	AHNAK	Neuroblast differentiation-associated protein AHNAK OS=Homo sapiens GN=AHNAK PE=1 SV=2	147	147			0.0793439	-0.0436986	0.833021	1.03075	-0.22498	17.7273	17.392	17.0638	17.4576	17.4815	17.3752	17.3944	17.4381	0.0437333
UN45A	HUMAN	UNC45A	Protein unc-45 homolog A OS=Homo sapiens GN=UNC45A PE=1 SV=1	2	2			0.0740451	-0.0728931	0.843247	1.05182	-0.210936	8.9629	8.23362	8.53138	8.10329	8.94544	8.89785	8.57597	8.64886	0.0728933
GFPT1	HUMAN	GFPT1	Glutamine--fructose-6-phosphate aminotransferase [isomerizing] 1 OS=Homo sapiens GN=GFPT1 PE=1 SV=3	2	2			0.0737301	-0.194911	0.843859	1.14465	-0.210098	6.94967	6.19151	7.79442	5.73246	8.51175	7.27612	6.97853	7.17344	0.19491
SSFA2	HUMAN	SSFA2	Sperm-specific antigen 2 OS=Homo sapiens GN=SSFA2 PE=1 SV=3	2	2			0.0736706	-0.151514	0.843975	1.11073	-0.209939	8.06609	8.60733	7.47573	8.93664	8.74819	6.91886	8.04972	8.20123	0.151513
TBB3	HUMAN	TUBB3	Tubulin beta-3 chain OS=Homo sapiens GN=TUBB3 PE=1 SV=2	11	2			0.0735263	-0.208472	0.844255	1.15546	-0.209555	8.26209	6.9012	5.68328	7.85798	5.83922	7.77479	6.94886	7.15733	0.208473
LMCD1	HUMAN	LMCD1	LIM and cysteine-rich domains protein 1 OS=Homo sapiens GN=LMCD1 PE=1 SV=1	2	2			0.0726908	-0.345931	0.845881	1.27097	-0.207328	8.26679	7.57743	7.16993	9.57365	4.74358	9.73471	7.67138	8.01731	0.34593
CDV3	HUMAN	CDV3	Protein CDV3 homolog OS=Homo sapiens GN=CDV3 PE=1 SV=1	8	8			0.0725643	-0.121807	0.846127	1.0881	-0.206991	11.5603	11.1674	10.7977	11.5068	10.2644	12.1196	11.1751	11.2969	0.1218
OFD1	HUMAN	OFD1	Oral-facial-digital syndrome 1 protein OS=Homo sapiens GN=OFD1 PE=1 SV=1	6	6			0.0645568	-0.242484	0.861873	1.18303	-0.185487	9.04439	12.5579	8.48382	9.71596	10.6883	10.4094	10.0287	10.2712	0.242517
CP110	HUMAN	CCP110	Centriolar coiled-coil protein of 110 kDa OS=Homo sapiens GN=CCP110 PE=1 SV=3	5	5			0.0575845	-0.0895497	0.875821	1.06404	-0.166527	10.6528	11.6027	9.81378	10.5603	11.0634	10.7142	10.6898	10.7793	0.08954
SPAT2	HUMAN	SPATA2	Spermatogenesis-associated protein 2 OS=Homo sapiens GN=SPATA2 PE=1 SV=2	7	7			0.0574093	-0.206573	0.876175	1.15394	-0.166047	10.6257	10.1421	8.71768	11.7056	7.94837	10.4512	9.82849	10.0351	0.206563
PCCA	HUMAN	PCCA	Propionyl-CoA carboxylase alpha chain mitochondrial OS=Homo sapiens GN=PCCA PE=1 SV=4	31	30			0.0506799	-0.0433311	0.889857	1.03049	-0.147523	16.3887	16.1517	15.9316	16.7073	15.8287	16.0659	16.1573	16.2006	0.0433
ABLM1	HUMAN	ABLIM1	Actin-binding LIM protein 1 OS=Homo sapiens GN=ABLIM1 PE=1 SV=3	4	4			0.0459071	-0.091046	0.89969	1.06514	-0.134248	11.5068	12.6506	10.7313	11.5216	12.4666	11.1737	11.6296	11.7206	0.0910667
MAP9	HUMAN	MAP9	Microtubule-associated protein 9 OS=Homo sapiens GN=MAP9 PE=1 SV=3	2	2			0.0416203	-0.107054	0.908615	1.07703	-0.122226	9.3015	6.93948	7.49185	7.14975	7.99435	8.90989	7.91094	8.018	0.107053
CCD50	HUMAN	CCDC50	Coiled-coil domain-containing protein 50 OS=Homo sapiens GN=CCDC50 PE=1 SV=1	5	5			0.0374516	-0.0528425	0.917378	1.03731	-0.110442	12.0868	11.8337	10.8842	11.8533	11.0498	12.06	11.6016	11.6544	0.0528
PHLB2	HUMAN	PHLDB2	Pleckstrin homology-like domain family B member 2 OS=Homo sapiens GN=PHLDB2 PE=1 SV=2	10	10			0.0357319	-0.0796687	0.921018	1.05678	-0.105554	13.0684	12.7292	10.697	12.0154	12.5167	12.2015	12.1649	12.2445	0.0796667
REPS1	HUMAN	REPS1	RalBP1-associated Eps domain-containing protein 1 OS=Homo sapiens GN=REPS1 PE=1 SV=3	3	3			0.0349203	-0.121139	0.922741	1.08759	-0.103241	10.1674	6.74112	9.93074	8.6865	9.85798	8.65821	8.94642	9.06756	0.121143
PARVA	HUMAN	PARVA	Alpha-parvin OS=Homo sapiens GN=PARVA PE=1 SV=1	4	4			0.0329622	-0.0657962	0.92691	1.04666	-0.0976461	12.6188	11.9366	11.3554	12.5241	10.9069	12.6773	11.9703	12.0361	0.0658333
MDHM	HUMAN	MDH2	Malate dehydrogenase mitochondrial OS=Homo sapiens GN=MDH2 PE=1 SV=3	2	2			0.0328913	-0.0704557	0.927062	1.05005	-0.0974433	8.09276	6.84798	6.54948	7.35755	8.11374	6.23029	7.16341	7.23386	0.0704533
MARCS	HUMAN	MARCKS	Myristoylated alanine-rich C-kinase substrate OS=Homo sapiens GN=MARCKS PE=1 SV=4	3	3			0.0320726	-0.0666739	0.928811	1.0473	-0.0950972	8.11374	8.94251	7.7879	7.60733	7.87652	9.56033	8.28138	8.34806	0.0666767
EIF2A	HUMAN	EIF2A	Eukaryotic translation initiation factor 2A OS=Homo sapiens GN=EIF2A PE=1 SV=3	5	5			0.0297574	-0.0621573	0.933776	1.04403	-0.0884429	10.5018	9.18982	8.50779	9.90989	8.6865	9.78953	9.3998	9.46197	0.06217
PLBL1	HUMAN	PLBD1	Phospholipase B-like 1 OS=Homo sapiens GN=PLBD1 PE=1 SV=2	2	2			0.0276694	-0.110735	0.938276	1.07978	-0.0824152	5.23509	8.93664	9.14211	8.74819	7.31288	7.58496	7.77128	7.88201	0.11073
PDLI1	HUMAN	PDLIM1	PDZ and LIM domain protein 1 OS=Homo sapiens GN=PDLIM1 PE=1 SV=4	13	13			0.0188267	-0.0190846	0.957576	1.01332	-0.056603	15.392	15.183	14.5746	15.4087	14.6269	15.1713	15.0499	15.069	0.0191
HS90B	HUMAN	HSP90AB1	Heat shock protein HSP 90-beta OS=Homo sapiens GN=HSP90AB1 PE=1 SV=4	9	3			0.0155679	-0.0144024	0.964788	1.01003	-0.0469704	11.1163	11.0701	10.6073	10.4305	11.2644	11.1421	10.9312	10.9457	0.0144333
GGH	HUMAN	GGH	Gamma-glutamyl hydrolase OS=Homo sapiens GN=GGH PE=1 SV=2	3	3			0.0128303	-0.0285225	0.970889	1.01997	-0.0388264	9.99435	7.72234	9.46352	8.84235	9.61287	8.81057	9.06007	9.0886	0.0285267
SC24B	HUMAN	SEC24B	Protein transport protein Sec24B OS=Homo sapiens GN=SEC24B PE=1 SV=2	5	5			0.0108354	-0.016983	0.975359	1.01184	-0.0328616	10.2527	11.1421	9.48382	10.1293	10.697	10.1033	10.2929	10.3099	0.0169933
KTN1	HUMAN	KTN1	Kinectin OS=Homo sapiens GN=KTN1 PE=1 SV=1	2	2			0.00677794	-0.0148613	0.984514	1.01035	-0.0206493	8.45121	8.04985	7.75489	7.41785	7.40088	9.4818	8.08532	8.10018	0.01486
SPAT7	HUMAN	SPATA7	Spermatogenesis-associated protein 7 OS=Homo sapiens GN=SPATA7 PE=1 SV=3	2	2			0.00467064	-0.0122313	0.989303	1.00851	-0.0142632	10.5699	10.0498	7.89482	9.05528	9.93369	9.56224	9.50484	9.51707	0.01223
RBG1L	HUMAN	RABGAP1L	Rab GTPase-activating protein 1-like OS=Homo sapiens GN=RABGAP1L PE=1 SV=1	4	4			0.00404794	-0.00824356	0.990723	1.00573	-0.0123703	11.2877	9.63844	10.6707	9.62753	11.1098	10.8842	10.5323	10.5405	0.00823
HSP7C	HUMAN	HSPA8	Heat shock cognate 71 kDa protein OS=Homo sapiens GN=HSPA8 PE=1 SV=1	19	8			0.000269983	-0.000154495	0.999379	1.00011	-0.000828622	12.2438	11.7855	12.1357	12.1954	11.8057	12.1643	12.055	12.0551	0.000133333

## Sheet: Cellular Component
source	term_name	term_id	adjusted_p_value	negative_log10_of_adjusted_p_value	term_size	query_size	intersection_size	effective_domain_size	intersections
GO:CC	cytoskeleton	GO:0005856	5.17396e-54	53.2862	2221	228	125	18842	LUZP1,CALD1,CEP170,LIMCH1,CCDC102A,DOCK7,PLEKHA5,PPP1R12A,PALMD,MAP1A,MPRIP,NDC80,LPP,ZYX,ACACA,DPYSL3,SMTN,ZNF185,MAP1B,SIRT2,LIMA1,LMOD1,FLNC,CTTN,MYLK,PCM1,RPS6KA1,FLNB,CCDC85C,FGD4,MYH9,SVIL,ATP6V1A,SYNPO,NEDD1,SPECC1,ASAP2,CLINT1,DCTN1,EIF4B,NACA,DAPK3,PKN1,CD2AP,NEXN,MAP4,SEPT9,EIF4G2,PAWR,PPP6R1,PPP6R3,CSDE1,PPP6R2,PC,CAMSAP1,KANK2,ABCF3,PPP1R18,PPP1R13L,TRIOBP,TNS1,TJP2,CNN3,FBLIM1,TGM2,P…
GO:CC	actin cytoskeleton	GO:0015629	3.86723e-50	49.4126	517	228	69	18842	LUZP1,CEP170,LIMCH1,CCDC102A,PLEKHA5,PPP1R12A,MAP1A,NDC80,LPP,ZYX,ACACA,DPYSL3,SMTN,SIRT2,LIMA1,FLNC,CTTN,RPS6KA1,FGD4,MYH9,SVIL,ATP6V1A,NEDD1,SPECC1,ASAP2,CLINT1,EIF4B,NACA,DAPK3,PKN1,MAP4,SEPT9,EIF4G2,PAWR,PPP6R1,CSDE1,PPP6R2,CAMSAP1,KANK2,PPP1R18,PPP1R13L,TNS1,TJP2,CNN3,TGM2,INPPL1,ERC1,RAPH1,DBNL,AKAP2,CEP85,PPP3CA,SHTN1,HSPA1B,TPM2,BAG3,CORO1C,SNX9,BCAR1,TRIP6,TWF1,SIPA1L3,ACTR2,TMOD3,AHNAK,…
GO:CC	cytoplasm	GO:0005737	2.40057e-30	29.6197	11620	228	217	18842	LUZP1,CALD1,CEP170,CCDC102A,PALLD,LMO7,DOCK7,CEP131,PLEKHA5,PPP1R12A,ACTN1,PALMD,MAP1A,MPRIP,NDC80,LPP,ZYX,ACACA,DPYSL3,SMTN,ZNF185,MAP1B,SIRT2,LIMA1,LMOD1,FLNC,CTTN,MYLK,PCM1,MAP7D1,RPS6KA1,FLNB,CCDC85C,FGD4,MYH9,SVIL,SPECC1L,ATP6V1A,SYNPO,SPECC1,KIAA1671,ASAP2,CTTNBP2NL,CLINT1,DCTN1,SYNC,EIF4B,PDLIM5,NACA,DAPK3,SORBS2,PKN1,CD2AP,NEXN,MAP4,SEPT9,DBN1,EIF4G2,PAWR,AFAP1,PPP6R1,PDLIM3,IDH1,RIPK1,PP…
GO:CC	cell junction	GO:0030054	1.03693e-29	28.9842	1312	228	76	18842	CCDC102A,PALLD,FILIP1L,PLEKHA5,PPP1R12A,MAP1A,NDC80,LPP,SMTN,ZNF185,MAP1B,SIRT2,LMOD1,FLNC,RPS6KA1,TACC2,FGD4,MYH9,SVIL,ATP6V1A,SPECC1,EIF4B,DAPK3,PKN1,CD2AP,SEPT9,DBN1,PAWR,PPP6R1,CSDE1,KANK2,PPP1R18,RPAP3,PPP1R13L,TRIOBP,TNS1,CNN2,TJP2,CNN3,LRCH1,TGM2,ERC1,ARHGAP29,CAST,SPG20,RAPH1,DBNL,AKAP2,LASP1,CEP85,MYO1E,PPP3CA,FN1,SHTN1,SEPT2,DAB2,UBA1,TNKS1BP1,CORO1C,BCAR1,TRIP6,STRN,TWF1,TES,ABR,ERBIN,…
GO:CC	microtubule cytoskeleton	GO:0015630	1.91515e-13	12.7178	1211	228	52	18842	CALD1,DOCK7,PLEKHA5,PALMD,MPRIP,DPYSL3,ZNF185,MAP1B,FLNC,MYLK,PCM1,FLNB,FGD4,MYH9,SVIL,SYNPO,NEDD1,CLINT1,NEXN,MAP4,PPP6R3,PC,CAMSAP1,PPP1R13L,FBLIM1,SPTBN1,TNS3,AAK1,PPP1R9B,TLN1,KIF11,PPME1,CEP41,CTNNA1,SEPT2,HSPA1B,CYLD,MAP7D3,KIF5B,NEK9,INCENP,ALMS1,CCT6A,SLAIN2,HSPH1,IST1,TUBB3,OFD1,CCP110,MAP9,MARCKS,SPATA7
GO:CC	lamellipodium	GO:0030027	9.19992e-12	11.0362	195	228	21	18842	CCDC102A,ACACA,FLNC,CTTN,CCDC85C,DAPK3,SEPT9,PPP6R2,TGM2,PDLIM4,CEP97,RAPH1,DBNL,CEP41,SHTN1,CORO1C,BCAR1,ACTR2,TUBB3,ABLIM1,PARVA
GO:CC	centrosome	GO:0005813	1.57197e-06	5.80356	519	228	25	18842	CALD1,DOCK7,PLEKHA5,MPRIP,MAP1B,MYLK,SYNPO,CLINT1,PPP6R3,FBLIM1,SPTBN1,TNS3,AAK1,PPP1R9B,KIF11,PPME1,SEPT2,CYLD,NEK9,ALMS1,SLAIN2,IST1,OFD1,CCP110,MARCKS
GO:CC	spindle	GO:0005819	4.14462e-06	5.38252	353	228	20	18842	CALD1,MAP1B,FLNC,PCM1,FGD4,SVIL,SYNPO,CLINT1,NEXN,PPP6R3,TNS3,TLN1,KIF11,CTNNA1,HSPA1B,CYLD,MAP7D3,INCENP,ALMS1,MAP9
GO:CC	microtubule	GO:0005874	1.6668e-05	4.77812	422	228	21	18842	CALD1,PALMD,ZNF185,MAP1B,MYH9,CLINT1,NEXN,MAP4,PPP6R3,PC,TNS3,TLN1,CEP41,CYLD,KIF5B,INCENP,CCT6A,SLAIN2,HSPH1,TUBB3,MAP9
GO:CC	midbody	GO:0030496	0.000492017	3.30802	174	228	12	18842	MAP1B,MYH9,SORBS2,PPP1R13L,MSN,SPG20,NUMBL,CTNNA1,HSPA1B,CYLD,INCENP,IST1
GO:CC	cilium	GO:0005929	0.00279776	2.55319	627	228	22	18842	CALD1,DOCK7,ZNF185,MYLK,SYNPO,CLINT1,NEXN,MAP4,CAMSAP1,SPTBN1,PPME1,CTNNA1,HSPA1B,CYLD,KIF5B,ALMS1,EPS15,EHD1,OFD1,CCP110,SPATA7,RABGAP1L
GO:CC	cytoplasmic vesicle	GO:0031410	0.0283187	1.54793	2346	228	49	18842	DOCK7,PPP1R12A,LPP,ACACA,RPS6KA1,SPECC1,CTTNBP2NL,SORBS2,PKN1,PDLIM3,IDH1,PPP1R18,VCL,TNS1,TGM2,SPG20,HSP90B1,RAPH1,CEP85,EXOC4,SHTN1,SEPT2,SEPT7,DAB2,SEC16A,UBA1,KIF5B,CORO1C,SNX9,AGFG1,PICALM,COL1A1,SH3KBP1,EPS15,HSPH1,CHMP7,COPB2,IST1,PNP,ACTR2,ARFGAP2,EHD1,AHCY,CHMP2B,HSP90AB1,GGH,SEC24B,RABGAP1L,HSPA8
GO:CC	pericentriolar material	GO:0000242	0.0364082	1.4388	21	228	4	18842	MYLK,SYNPO,PPP1R9B,KIF11

## Sheet: Biological Process
source	term_name	term_id	adjusted_p_value	negative_log10_of_adjusted_p_value	term_size	query_size	intersection_size	effective_domain_size	intersections
GO:BP	regulation of cytoskeleton organization	GO:0051493	4.18851e-13	12.3779	545	222	36	17847	CEP170,DOCK7,PALMD,ZNF185,SIRT2,LIMA1,FLNC,ATP6V1A,CLINT1,NACA,PKN1,CD2AP,SEPT9,PAWR,CSDE1,FLNA,PC,CAMSAP1,KANK2,PPP1R13L,INPPL1,AAK1,RAPH1,TLN1,KIF11,SEPT2,CYLD,SNX9,TWF1,ALMS1,SLAIN2,ACTR2,CHMP2B,TMOD3,MAP9,PHLDB2
GO:BP	microtubule cytoskeleton organization	GO:0000226	2.5806e-10	9.58828	563	222	33	17847	FILIP1L,DOCK7,PLEKHA5,PALMD,MPRIP,ZNF185,MYLK,PCM1,FLNB,FGD4,CLINT1,NEXN,PPP6R3,CSDE1,FLNA,PC,FBLIM1,TNS3,AAK1,PPP1R9B,TLN1,KIF11,SEPT2,CYLD,MAP7D3,ALMS1,SLAIN2,CHMP2B,TUBB3,CCP110,MAP9,PHLDB2,SPATA7
GO:BP	cell division	GO:0051301	1.17855e-08	7.92865	609	222	32	17847	FILIP1L,MPRIP,MAP1B,FGD4,MYH9,SVIL,SYNPO,CLINT1,PKN1,NEXN,MAP4,PPP6R3,PPP1R13L,INPPL1,TNS3,MSN,TLN1,PTPN12,CTNNA1,HSPA1B,ERCC6L,SNX9,BCAR1,NEK9,INCENP,CDC37,CHMP7,IST1,ACTR2,CHMP2B,CCP110,MAP9
GO:BP	cilium assembly	GO:0060271	1.22897e-08	7.91046	367	222	25	17847	DOCK7,MYLK,SYNPO,CLINT1,NEXN,MAP4,PPP6R3,CSDE1,PPP6R2,CAMSAP1,FBLIM1,TNS3,AAK1,PPP1R9B,PPME1,CTNNA1,HSPA1B,CYLD,ALMS1,ACTR2,EHD1,OFD1,CCP110,ABLIM1,PARVA
GO:BP	neuron projection development	GO:0031175	1.62845e-06	5.78823	1004	222	38	17847	CCDC102A,FILIP1L,PALMD,ACACA,ZNF185,FLNC,EIF4B,CD2AP,NEXN,SEPT9,DBN1,PC,CAMSAP1,PPP1R18,PPP1R13L,INPPL1,ERC1,MSN,CEP97,RAPH1,DBNL,MYO1E,PTPN12,EXOC4,CEP41,SHTN1,CTNNA1,KIF5B,STRN,TWF1,PICALM,SH3KBP1,IST1,ACTR2,EHD1,TUBB3,HSP90AB1,SEC24B
GO:BP	vesicle-mediated transport	GO:0016192	4.94682e-06	5.30567	2146	222	59	17847	PPP1R12A,DPYSL3,FLNC,FGD4,SPECC1,CTTNBP2NL,CLINT1,PKN1,AFAP1,PDLIM3,RIPK1,CSDE1,PPP1R18,VCL,TNS1,IGBP1,LRCH1,PDLIM4,INPPL1,SPTBN1,ERC1,CAST,SPG20,HSP90B1,RAPH1,LASP1,TLN1,CEP85,MYO1E,NUMBL,EXOC4,SEPT2,SEPT7,DAB2,SEC16A,KIF5B,CORO1C,EPN1,SNX9,PICALM,ABR,ALMS1,SH3KBP1,EPS15,HSPH1,CHMP7,COPB2,IST1,PNP,ACTR2,ARFGAP2,EHD1,CHMP2B,REPS1,HSP90AB1,GGH,SEC24B,RABGAP1L,HSPA8
GO:BP	centrosome cycle	GO:0007098	1.22514e-05	4.91181	125	222	13	17847	DOCK7,PLEKHA5,MYLK,CLINT1,PPP6R3,TNS3,PPP1R9B,TLN1,KIF11,ALMS1,CHMP2B,CCP110,MAP9
GO:BP	cell junction assembly	GO:0034329	2.5521e-05	4.5931	244	222	17	17847	CEP170,PPP1R12A,LMOD1,FLNC,SPECC1,NACA,CSDE1,PPP1R18,TRIOBP,CNN3,LASP1,EXOC4,SHTN1,CORO1C,TRIP6,STRN,PHLDB2
GO:BP	microtubule organizing center organization	GO:0031023	2.86724e-05	4.54254	134	222	13	17847	DOCK7,PLEKHA5,MYLK,CLINT1,PPP6R3,TNS3,PPP1R9B,TLN1,KIF11,ALMS1,CHMP2B,CCP110,MAP9
GO:BP	cytokinesis	GO:0000910	7.48068e-05	4.12606	172	222	14	17847	FGD4,MYH9,MAP4,INPPL1,CTNNA1,HSPA1B,SNX9,INCENP,CHMP7,IST1,ACTR2,CHMP2B,CCP110,MAP9
GO:BP	protein polymerization	GO:0051258	0.000156246	3.80619	276	222	17	17847	ZNF185,LIMA1,FLNC,CLINT1,SEPT9,PC,PPP1R13L,INPPL1,TNS3,RAPH1,SEPT2,MAP7D3,SNX9,TWF1,SLAIN2,ACTR2,TMOD3
GO:BP	mitotic spindle organization	GO:0007052	0.000213015	3.67159	107	222	11	17847	MPRIP,FLNB,CLINT1,NEXN,CSDE1,FBLIM1,AAK1,TLN1,SEPT2,CHMP2B,MAP9
GO:BP	cell adhesion	GO:0007155	0.00190433	2.72026	1421	222	40	17847	CEP170,CCDC102A,PALLD,PLEKHA5,PPP1R12A,NDC80,LPP,FLNC,FGD4,SVIL,SPECC1,EIF4B,NACA,PKN1,CD2AP,EIF4G2,CSDE1,PPP1R18,PPP1R13L,TJP2,CNN3,LRCH1,PDLIM4,CAST,LASP1,MYO1E,EXOC4,SHTN1,CYLD,CORO1C,BCAR1,TRIP6,COL1A1,ERBIN,HSPH1,PNP,TMOD3,PHLDB2,PARVA,PDLIM1
GO:BP	regulation of cilium assembly	GO:1902017	0.0102693	1.98846	54	222	7	17847	NEXN,MAP4,CAMSAP1,AAK1,HSPA1B,CYLD,CCP110
GO:BP	actin crosslink formation	GO:0051764	0.010488	1.97931	10	222	4	17847	PPP1R12A,ACACA,CSDE1,MARCKS
GO:BP	cell migration	GO:0016477	0.0137886	1.86048	1597	222	41	17847	CEP170,CCDC102A,FILIP1L,ACACA,ZNF185,SIRT2,FLNC,CTTN,MYLK,FGD4,SPECC1,NACA,SORBS2,PKN1,CD2AP,CSDE1,CAMSAP1,ARHGAP35,PPP1R18,TRIOBP,TNS1,ARFGAP1,ARHGAP29,TNS3,CAST,DBNL,MYO1E,EXOC4,CEP41,HSPA1B,DAB2,FOXO3,CORO1C,BCAR1,TRIP6,COL1A1,ABR,SH3KBP1,SRGAP1,PHLDB2,PARVA

## Sheet: Molecular Function
source	term_name	term_id	adjusted_p_value	negative_log10_of_adjusted_p_value	term_size	query_size	intersection_size	effective_domain_size	intersections
GO:MF	cadherin binding	GO:0045296	5.05752e-52	51.2961	330	224	61	18098	LUZP1,MAP1A,SIRT2,FLNC,RPS6KA1,FGD4,CTTNBP2NL,EIF4B,PKN1,MAP4,SEPT9,DBN1,PDLIM3,CSDE1,SYNPO2,PPP1R18,VCL,RPAP3,TNS1,CNN2,TJP2,INPPL1,SPTBN1,NDE1,RAPH1,AKAP2,LASP1,PTPN12,RAI14,CEP41,SHTN1,CTNNA1,HSPA1B,BAG3,STK38,KIF5B,TNKS1BP1,STAT1,HDLBP,SNX9,TWF1,TES,PICALM,MB21D2,TRIM25,LARP1,ZC3HAV1,EPS15,IST1,EHD1,CHMP2B,TMOD3,AHNAK,UNC45A,PHLDB2,PARVA,EIF2A,PDLIM1,HSP90AB1,KTN1,HSPA8
GO:MF	cell adhesion molecule binding	GO:0050839	1.91719e-45	44.7173	502	224	65	18098	LUZP1,PPP1R12A,MAP1A,SIRT2,FLNC,RPS6KA1,FGD4,SPECC1,CTTNBP2NL,EIF4B,PKN1,MAP4,SEPT9,DBN1,PDLIM3,CSDE1,SYNPO2,PPP1R18,VCL,RPAP3,TNS1,CNN2,TJP2,INPPL1,SPTBN1,NDE1,CAST,RAPH1,AKAP2,LASP1,PTPN12,EXOC4,RAI14,CEP41,SHTN1,CTNNA1,HSPA1B,BAG3,STK38,KIF5B,TNKS1BP1,STAT1,HDLBP,SNX9,TWF1,TES,PICALM,MB21D2,TRIM25,LARP1,ZC3HAV1,EPS15,IST1,EHD1,CHMP2B,TMOD3,AHNAK,UNC45A,PHLDB2,PARVA,EIF2A,PDLIM1,HSP90AB1,KTN1,H…
GO:MF	actin binding	GO:0003779	5.9341e-41	40.2266	432	224	58	18098	LUZP1,CEP170,CCDC102A,PPP1R12A,PALMD,MAP1A,DPYSL3,SMTN,ZNF185,SIRT2,LIMA1,LMOD1,FLNC,CTTN,RPS6KA1,CCDC85C,FGD4,MYH9,ATP6V1A,SPECC1,EIF4B,CD2AP,SEPT9,EIF4G2,PAWR,PPP6R1,CSDE1,PPP6R2,KANK2,ABCF3,PPP1R18,PPP1R13L,TRIOBP,TNS1,TJP2,TGM2,PDLIM4,INPPL1,ERC1,CAST,RAPH1,DBNL,AKAP2,LASP1,CEP85,FN1,CEP41,SHTN1,TPM2,EPB41L1,CORO1C,TWF1,ACTR2,TMOD3,ABLIM1,PARVA,MARCKS,PDLIM1
GO:MF	protein binding	GO:0005515	1.96766e-14	13.706	12715	224	208	18098	LUZP1,CALD1,CEP170,CCDC102A,PALLD,FILIP1L,DOCK7,CEP131,PLEKHA5,PPP1R12A,PALMD,MAP1A,MPRIP,NDC80,LPP,ZYX,ACACA,DPYSL3,SMTN,ZNF185,MAP1B,SIRT2,LIMA1,LMOD1,FLNC,CTTN,MYLK,MAP7D1,RPS6KA1,FLNB,CCDC85C,FGD4,MYH9,SVIL,ATP6V1A,SYNPO,NEDD1,SPECC1,KIAA1671,ASAP2,CTTNBP2NL,CLINT1,SYNC,EIF4B,PDLIM5,NACA,DAPK3,SORBS2,PKN1,CD2AP,NEXN,MAP4,SEPT9,DBN1,EIF4G2,PAWR,AFAP1,PPP6R1,PDLIM3,IDH1,RIPK1,PPP6R3,HAUS6,ZC3H1…
GO:MF	actinin binding	GO:0042805	1.12632e-05	4.94834	40	224	8	18098	CCDC102A,PALLD,EIF4B,PPP6R1,KANK2,TGM2,ERC1,PDLIM1
GO:MF	phosphatase binding	GO:0019902	0.00153336	2.81436	186	224	12	18098	ASAP2,AFAP1,RIPK1,PHLDB1,ABCF3,PIBF1,TGM2,SPG20,DBNL,RAI14,STAT1,STRN
GO:MF	microtubule binding	GO:0008017	0.0304443	1.51649	251	224	12	18098	PALMD,ZNF185,CLINT1,NEXN,PC,TJP2,TNS3,TLN1,MAP7D3,KIF5B,ALMS1,MAP9
GO:MF	Rho GTPase binding	GO:0017048	0.0310672	1.5077	177	224	10	18098	FILIP1L,CCDC85C,NACA,SORBS2,AFAP1,CSDE1,PPP1R13L,CORO1C,ABR,SRGAP1
GO:MF	Ras GTPase binding	GO:0017016	0.0414709	1.38226	431	224	16	18098	FILIP1L,DPYSL3,CCDC85C,NACA,SORBS2,AFAP1,CSDE1,PPP1R13L,SPTBN1,NUMBL,CORO1C,PICALM,ABR,EHD1,SRGAP1,RABGAP1L
