# Supplementary material for: LUZP1, a novel regulator of primary cilia and the actin cytoskeleton, is a contributing factor in Townes-Brocks Syndrome
Source: eLife. 2020 Jun 18;9:e55957. doi: 10.7554/eLife.55957 (PMC7363444; doi:10.7554/eLife.55957)
Supplement: Source data 2. [file elife-55957-data2.xlsx]

## Sheet: Figure 3C
LUZP1 Intensity					LUZP1 area
Control Non-St	TBS Non-St	Control St	TBS St		Control Non-St	TBS Non-St	Control St	TBS St
75.192	56.663	38.116	43.051			0.000989	0.007	0.002
67.962	40.247	33.773	60.99		0.002	0.002	0.001	0.007
60.143	39.926	36.98	43.721		0.002	0.005	0.001	0.000956
66.069	54.894	42.958	45.716		0.002	0.001	0.002	0.006
64.027	52.759	55.641	66.836		0.002	0.002	0.002	0.007
43.01	71.217	32.835			0.002	0.006	0.005	0.000556
64.747	56.18	46.977	44.754		0.002	0.004	0.000967	0.007
77.562	30.272	35.844	32.129		0.002	0.001	0.001	0.000689
81.524	52.521	60.067			0.002	0.002	0.000667	0.001
63.182	47.859	37.083	32.505		0.002	0.000944	0.001	0.002
41.847	65.969	30.618	37.141		0.002	0.006	0.002	0.002
104.392	64.587	33.728	39.94		0.006	0.008	0.002	0.002
64.313	37.202	59.059	38.777		0.004	0.004		0.004
34.821	60.247	51.231	33.077		0.005	0.000989	0.005	0.002
72.585	42.276	55.627	36.879		0.004	0.002		0.002
92.982	60.169	45.793	46.074		0.002	0.000989	0.002	0.002
92.922	42.366	40.45	60.979		0.002	0.002	0.001	0.002
103.283	43.429	22.029	42.008		0.004	0.002	0.003	0.01
88.536	58.863	39.015	47.062		0.006	0.002	0.003	0.006
101.509	56.224	28.526	47.037		0.003	0.002	0.003	0.003
82.928	77.131	62.149	46.597		0.002	0.002	0.003	0.008
96.068	39.02	42.914	36.737		0.002	0.004		0.001
135.469	72.67	60.84	45.513		0.002	0.002	0.002	0.001
92.353	52.415	33.329	46.813		0.001	0.004	0.002	0.008
76.259	56.749	40.929	40.213		0.002	0.004	0.003	0.005
110.009	66.741	26.288	38.243		0.002	0.006	0.000733	0.003
100.685		45.598			0.001		0.007
73.437		38.806			0.002		0.003
95.034		81.101			0.000978		0.002
98.153		42.025			0.002		0.003
86.654		47.372			0.002		0.003
83.926		39.991			0.002		0.002
101.684		25.645			0.002		0.002
82.593		41.43			0.003		0.005
87.691		28.204			0.004		0.004
63.188		26.468			0.003		0.001
93.36		25.672			0.006		0.000644
73.497		26.663			0.005		0.001
55.036		25.778			0.002		0.0007
66.831		40.276			0.004		0.001
75.906		53.068			0.003		0.002
93.72		34.125			0.002		0.004
		26.339					0.004

## Sheet: Figure 4B
LUZP1 Intensity
Control	TBS275
61.389	34.328
56.701	24.659
62.297	28.558
54.329	31.596
52.907	45.372
49.611	59.581
79.887	23.88
46.48	28.06
58.633	31.665
43.048	27.407
46.096	46.191
58.023

## Sheet: Figure 4C
Actin Intensity
Control	TBS275
62.492	43.995
49.339	42.82
32.062	32.223
28.613	34.315
82.106	49.933
46.314	36.199
67.886	29.056
59.941	22.957
37.459	29.118
80.474	46.191
31.301
35.555
46.158

## Sheet: Figure 4F
LUZP1/GAPDH
TX 100 293 -CytD	TX100 293 +CytD	WB5 293 -CytD	WB5 293 +CytD
1	1.24409	3.10919	3.28411
1	1.35036	2.94852	3.11036
1	1.31491	4.81428	4.65979

## Sheet: Figure 6B
Ciliated Cells %
WT 0h st	LUZP1 K0 0h st	LUZP1+ 80h st	WT 48h st	LUZP1 KO 48h st	LUZP1+ 48h st
10	0	25	100	90	75
12.9032	88.2353	11.1111	75	60	75
7.69231	66.6667	26.6667	100	90.9091	57.1429
15.3846	28.5714	23.5294	50	100	66.6667
	81.8182	15	87.5	66.6667	75
0	80	9.52381	33.3333	91.6667	80
16.6667	50	10.5263	66.6667	60	100
5.55556	92.8571	16.6667	66.6667	75	60
9.09091	50	7.69231	57.1429	100	14.2857
3.84615	33.3333	23.0769	20	100	100
	87.5	33.3333	100	80
	69.2308		64.2857	83.1129
	66.2012		62.5	50
	75		37.5	57.8947
	75	18.75	50	91.6667	57.1429
	52.9412	20	100		77.7778
	85.7143	9.52381	100	100	57.1429
	68.421	28.5714	66.6667	58.3333	53.3333
	61.1111	42.8571	80	81.8182	75
	56.25	33.3333	100	66.6667	16.6667
		30.4348		81.8182	57.1429
0	64.2857	43.75	75	64.2857	50
28.5714	55.5556	44.4444	62.5	75	80
12.5	57.1429	31.25	25	61.5385	40
10.5263	87.5		100	78.5714
25	50		50	69.2308
0	43.75	50	40	92.3077	57.1429
9.09091	72.7273	14.2857	71.4286	75.4155	90
0	91.6667	7.14286	60	83.3333	40
0	54.5455	27.7778	75	70	80
0	53.5714	8.33333	60	100	50
	68.421	11.1111	50		57.1429
	63.5605	33.3333	50	88.8889	66.6667
	61.5385	11.1111	80	66.6667	42.8571
	45.4545	10	100	36.8421	22.2222
	63.6364	9.09091	100	70	63.6364
			20	100
	38.4615		33.3333	64.2857
	77.7778		60	83.3333
	75		66.6667	71.4286
	55.5556		62.5	83.3333
	54.5455			66.6667
33.3333	53.3333		66.6667	75
23.0769	41.6667		20	73.3132
3.44828	35.7143		50	69.2308
20	76		25	88.8889
4.54545	46.1538		100	100
13.0435	27.2727		100
9.52381	52.8619		50
9.52381	66.6667		42.8571
6.25	50		66.6667
5.55556	50		50
25			100
13.9364			60
14.2857			75
0			66.6667
7.69231			75
			66.6667
			50
			66.6667
			66.6667
			100

## Sheet: Figure 6C
Cilia lenght
WT 0h st	LUZP1 K0 0h st	LUZP1+ 80h st	WT 48h st	LUZP1 KO 48h st	LUZP1+ 48h st
2.56513	4.3382	3.74433	2.9	2.61247	4.68722
3.06858	3.94422	3.58056	3.78486	3.02007	6.58246
1.82483	3.8546	3.98489	2.60384	3.75899	3.26956
2.65377	4.72933	3.6255	5.16833	4.16078	4.41353
1.53052	2.76586	2.63154	0.860232	2.71662	6.39098
2.4436	3.10644	1.38362	3.19061	3.42011	4.15933
1.80278	3.60694	3.41442	6.25267	5.2226	5.12048
2.68129	3.72022	1.8868	3.245	1.92094	5.74641
1.22066	4.07186	2.86531	2.95296	2.56125	6.70372
1.5	3.04138	2.94398	4.52856	4.48473	5.98305
1.5	1.90263	1.17047	4.65977	3.77328	6.10363
1.67631	3.20294	2.92178	4.53465	3.61671	4.66205
2.96091	3.98497	3.03645	3.19062	5.06952	3.51577
2.1095	4.48045	2.81602	4.89618	1.93132	7.14576
2.69119	3.62353	2.06155	4.75707	3.7	3.89101
2.76134	2.68122	4.73698	4.05028	4.65189	2
1.72046	2.9558	3.228	3.66197	5.23928	2.69073
3.32837	2.08769	3.70391	2.23607	4.11825	2.20227
0.95	2.22783	1.3	4.44078	4.70384	1.5
3.00942	1.87779	1.69706	6.04528	3.45138	6.46863
	4.56801	3.34414	4.29737	4.57316	7.02928
	2.13016	2.41661	3.80532	3.94872	6.21289
	3.71073	3.1	2.65707	4.46105	5.44558
3.41898	3.90777	1.41421	3.4587	5.25547	8.34804
2.7313	3.89625	3.13847	5.86125	3.92046	3.44819
3.85679	3.75927	1.76301	6.299	3.80132	5.92284
1.94165	4.17994	2.30868	4.14849	3.58776	3.96232
2.77309	3.28702	2.0025	3.36006	1.3	4.82597
1.42302	2.56081	3.034	5.10989	4.65797
2.42579	2.73525		4.14191	3.57374
2.05548	4.0359		3.92046	2.98336
	2.75563		2.08806	3.36006
	2.76384	2.97321	4.31948	4.10487	3.15054
	3.15659	2.82843	4.19258	5.43323	6.81229
	1.99978	3.07	5.9203	4.5607	3.03487
	2.11954	3.48511	4.64039	4.74342	2.48105
1.9813	3.03499	3.92046	3.06757	3.31059	7.53139
2.05183	3.38094	4.12311	4.50444	4.50217	4.86228
0.88459	2.24838	3.7	1.43178	3.07302	6.29687
2.74591	3.08947	2.28035	3.85724	4.45533	3.23417
1.94165	3.29021	1.3153	3.89706	5.21746	4.49829
3.5296	2.70177	2.46015	5.06919	2.40416	4.87545
2.9	1.42169	6.00653	2.36009	6.17223	7.63253
1.253	3.65001	2.90689	2.40832	4.88904	5.08656
2.28035	2.28262	4.06155	2.5632	5.55943	8.35634
1.97041	2.08199	2.8651	1.76918	4.38482	6.12335
3.11849	5.10406	2.10238	3.28408	4.87032	4.76416
1.52971	2.40295	4.41285	3.3541	5.53083	5.35933
1.6	2.42108	2.34325	2.01246	3.92959	5.16624
3.45145	2.26774	3.39443	3.76561	2.08942	6.80294
1.14017	3.60949	6.07499	3.32471	4.30116	5.03948
1.51327	3.86764	3.19531	3.89646	3.73378	4.41527
2.64764	2.54816	2.8	5.50091	4.22019	5.04767
3.54561	4.79843	2.24722	3.9488	3.00832	7.58297
3.82485	4.09049	2.88995	3.18904	2.54951	9.54938
2.14009	4.23665	1.70294	3.19317	5.43323	4.81041
1.52643	4.15644	3.30207	5.04269	4.28019	2.63059
2.88255	3.93363	2.69258	4.36817	4.74342	2.28035
2.8	4.47107	1.92094	3.03576	3.76961	2.7
1.58114	3.39809	1.7	4.50444	4.70135	7.0214
2.68701	3.16177	2.21359	2.64764	3.83275	6.86003
1.52643	1.82937	3.16228	6.00664	1.60312	3.60555
2.1095	2.55221	2.40208	4.52548	3.94462	4.77078
1.04403	2.17086	3.03145	5.56528	3.41174	4.2417
3.03457	3.56284	0.824621	3.98246	2.89728	5.97001
	3.71068	2.45967	5.78858	7.26375	6.33246
	2.81566	2.2561	2.09798	2.36015	6.25768
	3.71068	4.56109	2.84726	3.1241	5.91423
	2.70177	3.30152	3.05317	3.73238	3.80132
	3.01279	4.28523	5.68568	4.07483	3.47065
	3.04138	2.37065	4.49444	1.89906	5.72713
	2.72947	1.7	4.68615	4.32666	7.98568
	3.76491	2.97321	5.51574	1.36015	4.70947
	5.30472	3.84187	3.99642	4.67547	3.78202
	3.54401	2.90689	5.80293	3.23863	4.28644
	4.46407	4.28201		3.55913	3.00666
	2.33869	4.02244		4.29472	3.68917
	3.44819	2.78114		3.229	6.48957
	2.31948	3.37431	2.71662	1.84391	2.52389
	2.13776	1.9799	4.40333	2.84429	3.28085
	3.05941	3.74833	4.19762	1.7	4.44072
	2.56125	2.40208	3.11127	4.25441	6.37307
	2.33452	3.2	2.76015	2.82258
	3.29762		3.8559	4.93356
	2.84795		5.0463	5.08665
	5.83026		5.18768	2.63294	3.38473
	4.1668		5.53395	6.80905	6.47246
	3.62454	2.48395	6.17822	3.24139	4.05759
	2.81566	4.14951	4.88529	3.52278	5.10882
	3.62215	1.74642	2.1095	2.12603	1.92094
	2.86331	2.40208	6.39585	5.44059	2.91204
	3.42116	1.3153	3.45254	4.14382	6.69424
	2.87906	3.72374	2.9	2.80179	2.65529
	2.57863	4.07063	3.22066	5.87921	4.46126
	2.85682	3.70681	5.09796	2.72029	4.04618
	4.03275	3.41321	6.41772	3.10238	5.72713
	3.49543	1.7	3.32415	4.94773	2.8
	2.16782	3.96024	3.84852	4.85077	2.91548
	4.34045	5.57191	5.67945	5.67625	4.2864
	3.30056	4.73814	3.98121	3.5	5.84173
	3.03136	3.06757	2.74787	2.44017	6.43104
	3.42072	1.48661	2.70185	3.60217	3.66742
	2.48105	3.49857	2.92746	4.94975	5.03696
	2.75149	2.10984	1.69706	3.54222	8.02337
	4.14887	3.04795	4.07392	6.49236	5.23848
	1.49892	2.11896	3.02324	4.94907	4.20476
	1.80475	4.22966	5.94001	5.00532	6.06408
	2.76349	3.42053	2.18561	4.20119	2.81602
	2.54345	2.1095	3.16228	3.95601	3.25576
	2.57843	1.93132	5.6304	3.1241	3.14006
	3.50152		5.09902	3.96989	5.66918
	3.4603		3.73631	5.92312	4.71699
	1.709		4.36792	4.11656	2.47386
	3.58574		4.00125	3.49249	4.54533
	3.95425		4.53426	5.26079	6.00217
	2.84726		1.5027	3.5364	3.04138
	2.44164		0.806226	2.86007	2.95466
	2.16161		2.84013	4.90408	4.9868
	2.54816		4.53566	4.12311	2.66833
	1.65522		3.91152	5.48179	3.16228
	2.90971		5.41202	4.81295	3.30152
	2.62157		4.39947	2.40416	5.6459
	3.37333		2.05913	4.07922	6.9907
	3.81513		1.9105	5.01598
	2.97496		4.245	2.54951	5.9172
	2.61765		4.75045	4.37409	4.56508
	2.75115		4.65848	4.27551	6.01664
	2.45819		4.74131	1.94165	6.01664
	3.15116		4.21172		5.84637
	3.17967		5.03289		2.54951
	4.68406		4.92994		4.41475
	2.84339		3.79473	5.2	3.28024
	2.34116		3.52278	2.45967
	2.9558		3.82099	4.65732
	3.28697		5.08836	4.3197
	3.70728		4.80833	4.14367
	3.71068		2.43516	5.48582
	3.30056		5.3718	1.3153
	3.21771		4.49222	4.71342
	2.84339		3.85862	5.26832
	2.56128		4.83438	4.86228
	3.07513		4.31741	3.72354
	3.56277		3.2311	2.32594
	3.74697		4.83839	4.51774
	3.62519		3.44819	3.5861
	3.30056		4.2351	3.53613
	3.56277		5.48809	5.3
	2.84726		3.49285	3.39706
	3.18631		4.07111	4.49276
	2.76324		3.28024	2.52389
	2.48066		5.46443	5.61427
	3.9344		3.03992	2.08087
	2.69883		5.18512	3.32415
	3.74647		5.22015	3.30606
	2.98592		3.63401	4.93607
	2.16311			6.77924
	2.13016		3.70135	5.08035
	3.28697		4.67547	1.84391
	2.88255		5.35904	4.3566
	4.03264		4.04957	7.47686
	3.39783		5.53542	7.11126
	2.0383		6.16019	4.94359
	3.60053		4.26464	3.57351
	2.34607		4.26826	5.63412
	1.34042		4.77361	3.84708
	3.63893		3.75537	5.24023
	3.21771		4.84145	1.92354
	4.04134		5.86496	4.58039
	2.84339		5.37354	5.44518
	2.54816		7.01515	2.36828
	1.89559		4.68722	4.48862
	4.01179		3.97205	2.6
	3.08058		5.37069	4.79944
	3.4		5.16655	3.92938
	2.13776		3.18701	2.90689
	3.39754		3.33766	3.63456
	1.20416		5.87902	7.00928
	2.43516		4.7	4.11825
	3.78328		4.13453	4.05242
	2.6627		8.5	3.22047
	3.03645		5.52415	3.79671
	3.89487		4.59599	1.41421
	3.00832		3.98403	5.85307
	2.26274		5.12513	3.7
	2.90689		3.08058	0.728011
	1.26491		1.84391	5.50091
	3.78202		4.03113	3.82046
	3.48571		4.531	2.54951
	2.26774		5.37644	2.67942
	3.2906		4.78539	3.7
	3.62817		6.38463	3.72458
	3.05718		5.3178	4.33962
	3.89135		3.2249	4.57111
	1.97106		5.78705	5.19929
	3.68668		3.08885	3.90512
	4.03275		2.18477	7.56627
	2.99622		3.7	7.32441
			2.83019	5.49291
			5.31601	2.52066
			3.7394	2.4
	2.42074		5.28367	5.37122
	2.74893		4.92527	4.94862
	2.77309		5.24993	5.18401
	4.50322		2.16333	3.92066
	3.25269		4.68401	5.43812
	3.36155		5	5.16491
	1.8868		4.6902	4.83839
	2.75862		5.09259	3.86469
	3.80278		7.00077	1.41421
	1.97151		1.83576	4.71275
	2.29238		6.82279	5.09902
	3.41801		3.39567	2.33238
	4.11494		5.89716	2.81602
	2.45804			2.95466
	3.29021			5.95621
	5.71832			4.48444
	3.99232			2.84429
	1.59321			4.98197
	3.82063			5.40833
	4.13037			3.10161
	2.19317			5.30789
	2.13776			5.18254
	2.54951			4.15259
	3.15096			5.63028
	5.08308			2.78926
	3.10161			3.15136
	2.72029			4.17612
	2.65707			5.06063
	2.69308			2.83845
	4.03113			4.15968
	2.72947			4.628
	0.6			2.62488
	2.4			3.98497
	2.7074			6.13161
	2.7			5.41091
	2.24722			1.78045
	1.62788			3.22025
	2.19317			6.02031
	3.70129			4.14924
	2.16161			4.03113
	3.0565			3.80132
	1.82952			6.44072
	3.03499			2.54951
	1.19914			3.52278
	3.29021			2.74591
	3.31043			4.9108
	1.00531			3.80803
	2.71242			5.25985
	2.31356			2.64008
	4.24458			3.63456
	3.39793			4.60977
	3.62817			1.9
	3.60053			2.9
	2.71465			2.30868
	3.05718			3.22025
	2.49428
	3.03457
	2.88321
	2.7554
	2.55231			4.63173
	3.01637			4.85077
	3.60939			4.38302
	2.97496			4.92447
	2.75149			3.78568
	4.15086			3.02426
	4.03583			3.15753
	2.283			4.88719
	3.29762			4.57001
	3.51877			6.15568
	1.62121			4.66476
	1.81079			6.02163
	2.48105			3.90569
	1.64881			3.4856
	3.56277			4.88274
	1.62121			4.90172
	2.16141			4.85367
	3.08629			4.52611
	3.72287			2.90689
	3.98262			4.24264
	3.22674			4.34837
	3.46045			4.7294
	2.98651			5.74282
	4.49324			4.86101
	3.17931			4.90408
	2.36962			2.24722
	2.55257			3.96962
	2.73445			4.86435
	2.55221			2.74617
	2.55221			4.44072
	2.99712			6.0829
	3.94302			4.78282
	3.2281			5.79741
	2.88321			5.23273
	2.1457			3.80789
	2.45819			5.78014
	1.79827			6.22122
	3.04466			5.27681
	3.4767			3.12403
	3.14773			5.09608
	3.28726			5.38191
	3.63655			5.86106
	2.51259			3.54683
	2.39827			3.72045
	3.3677			4.2069
	3.49845			4.39608
	2.75563			3.39989
	2.95241			5.33868
	4.29732			3.93017
	2.36994			2.58062
	2.98651			3.67151
	1.54295			7.5187
	4.36929			3.5609
	2.40238			4.23708
	2.81566			3.50828
	2.54755			4.14018
	5.88973			3.75522
	2.82767			7.0881
	4.11844			2.14009
	3.44819			4.531
	3.43576			4.64093
	4.17253			3.95076
	2.7868			3.64005
	2.64008			2.71803
	3.11737			5.1
	4.51436			4.19069
	3.73657			1.28062
	4.41475			7.03881
	3.96989			3.82753
	2			3.68086
	2.73693			4.32413
	2.28035			4.34178
	2.28494			3.44131
	4.06011			4.27207
	3.90416			3.09396
	3.02666			4.3008
	3.64269			4.98203
	3.43657			3.66879
	3.1257			2.94109
	3.36155			4.17364
	2.13013			4.68858
	2.16333			3.66192
	2.54951			3.02324
	1.82952			2.84253
	2.87906			4.90439
	1.56489			4.49232
	3.36817			4.38331
	2.82796			5.56597
	3.36782			6.5
	2.58693			4.24382
	3.17547			5.67983
	1.19885			2.94029
	2.98592			4.71228
	3.20734			2.45967
	1.90758			5.06404
				1.64012
				3.98121
				4.81861
				3.32593
	1.64012			3.26956
	3.26497			4.49444
	3.40588			1.52462
	2.15407			4.66228
	4.60977			6.36617
	1.7			4.21873
	1.98494			3.58366
	3.1799			2.50799
	1.93132			5.48698
	4.272			4.0809
	2.26716			0.72111
	2.48395			3.44819
	2.38537			1.74642
	2.28035			3.89487
	1.56525			3.86011
	1.78045			3.81838
	1.98167			3.44093
	1.64012			3.48403
	3.61386			4.08866
	1.89737			2.6
	1.67631			2.1095
	3.80132			3.27678
	2.97321			5.62156
	3.98246			2.45967
	2.80179			1.22066
	2.12132			7.44972
	4.57994			5.72451
	2.30217			6.92648
	1.7			3.74849
	4.272			6.45901
	3.62491			4.86635
	3.9963			4.84991
	2.86531			1.76918
	4.02616
	2.98329
	3.228
	3.36155
	3.73363
	1.36015
	2.92746
	2.48395
	4.21901
	3.22025
	3.3249
	2.8178
	2.77849
	4.08044
	3.13847
	4.42719
	3.32866
	2.86356
	2.8178
	3.82099
	4.24853
	3.53553
	3.63593
	2.26716
	0
	3.3541
	1.7
	3.92046
	3.32415
	3.24605
	2.12132
	1.66433
	3.11448
	3.94081
	4.972
	2.82843
	3.44819
	2.68122
	1.33956
	3.86264
	3.53412
	2.78029
	3.55106
	2.5
	3.96155
	2.33452
	3.62817
	2.8948
	3.23568
	3.99951
	1.94853
	2.06155
	3.30152
	2.34094
	2
	3.44819
	2.96816
	3.7
	3.28024
	3.14081
	2.53769
	3.80238
	4.02616
	2.5
	4.43471
	1.00531
	2.30217
	1.83848
	4.25206
	2.02485
	2.41868
	2.33452

## Sheet: Figure 6E
% of cells with 2 CCP110 loci
WT	LUZP1 KO
75	25
100	50
100	0
50	0
100	0
100	0
50	12.5
100	33.3333

## Sheet: Figure 7A
Gli1
WT -PUR	WT +PUR	LUZP! KO - PUR	LUZP1 KO + PUR
0.84	1.57	1.13	0.6
1.15	1.64	2	1.59
1	1.7	1.84	1.93
0.82	1.78	1.05	0.85
1.18	1.31	1.53	1.25

## Sheet: Figure 7B
Ptch1
WT -PUR	WT +PUR	LUZP! KO - PUR	LUZP1 KO + PUR
0.455404	1.31514	1.27034	1.35212
1.20182	1.06823	1.23561	1.44916
1.34278	1.18117	1.85989	2.26611
0.792313	1.62476	1.35481	3.50677
1.20769	2.33058	3.76737	4.35445
1.0714	2.17	2.16	2.29
0.928601	2.02	4.25	1.21

## Sheet: Figure 7D
Luciferase activity
WT 0h Pur	LUZP1 KO 0h Pur	LUZP1+ 0h Pur
1.23033	2.01818	0.505692
1.08871	1.95053	0.542745
1.02303	1.78737	0.4748
0.657935	1.76874	0.473486
1.37031	1.27071
0.901723	1.37145
0.894632	1.07618
0.833341

[truncated: 9 more sheets: Figure 7E, Figure 8C, Figure 9B, Figure 9D, Figure 9F, Figure 10B, Figure 2_Supp 1, Figure 9_Suppl 2, Figure 10_Suppl 1B]
